# Supplementary material
Source: MDPI journal article supplement (https://www.mdpi.com/2304-6740/12/5/140)

## Supporting information

### **Silver(I) and copper(I) complexes of dicarboxylic acid derivatives: Synthesis, characterization and thermal studies.**

**Katharina Hankel née Reinhold, Fabian Burzlaff, Björn B. Beele, and Fabian Mohr\***

Anorganische Chemie, Fakultät für Mathematik und Naturwissenschaften, Bergische Universität  
Wuppertal, Gausstr. 20, 42119 Wuppertal, Germany

### **Table of contents**

|                                                                        |    |
|------------------------------------------------------------------------|----|
| Table S1                                                               | 2  |
| NMR- and IR-spectra of the polymeric silver(I) carboxylates            | 3  |
| NMR- and IR-spectra of the bis(triphenylphosphine) silver(I) complexes | 7  |
| NMR- and IR-spectra of the bis(triphenylphosphine) copper(I) complexes | 19 |

**Table S1.** Crystallographic and refinement details.

|                                               | <b>1a</b>                                                                                                      | <b>2</b>                                                                                           | <b>2a</b>                                                                                                      | <b>4</b>                                                                                                     | <b>5a</b>                                                                                                      | <b>6a</b>                                                                                                      | <b>7a</b>                                                                                                         | <b>8a</b>                                                                                                      |
|-----------------------------------------------|----------------------------------------------------------------------------------------------------------------|----------------------------------------------------------------------------------------------------|----------------------------------------------------------------------------------------------------------------|--------------------------------------------------------------------------------------------------------------|----------------------------------------------------------------------------------------------------------------|----------------------------------------------------------------------------------------------------------------|-------------------------------------------------------------------------------------------------------------------|----------------------------------------------------------------------------------------------------------------|
| CCDC code                                     | 2266684                                                                                                        | 2266682                                                                                            | 2266685                                                                                                        | 2266683                                                                                                      | 2266686                                                                                                        | 2266689                                                                                                        | 2266688                                                                                                           | 2266687                                                                                                        |
| Empirical formula                             | C <sub>41</sub> H <sub>38</sub> NO <sub>3</sub> P <sub>2</sub> Ag                                              | C <sub>4</sub> H <sub>6</sub> NO <sub>3</sub> Ag                                                   | C <sub>80</sub> H <sub>71</sub> N <sub>2</sub> O <sub>6</sub> P <sub>4</sub> Ag <sub>2</sub>                   | C <sub>6</sub> H <sub>9</sub> O <sub>4</sub> Ag                                                              | C <sub>41</sub> H <sub>37</sub> O <sub>3</sub> P <sub>2</sub> Ag                                               | C <sub>41</sub> H <sub>39</sub> O <sub>2</sub> P <sub>2</sub> Ag                                               | C <sub>41</sub> H <sub>39</sub> O <sub>2</sub> P <sub>2</sub> Cu                                                  | C <sub>41</sub> H <sub>37</sub> O <sub>3</sub> P <sub>2</sub> Cu                                               |
| Formula weight                                | 762.53                                                                                                         | 223.97                                                                                             | 748.51                                                                                                         | 253.00                                                                                                       | 747.51                                                                                                         | 733.53                                                                                                         | 689.20                                                                                                            | 703.18                                                                                                         |
| Crystal system                                | Triclinic                                                                                                      | Monoclinic                                                                                         | Triclinic                                                                                                      | Triclinic                                                                                                    | Triclinic                                                                                                      | Triclinic                                                                                                      | Triclinic                                                                                                         | Triclinic                                                                                                      |
| Space group                                   | P-1                                                                                                            | I2/a                                                                                               | P-1                                                                                                            | P-1                                                                                                          | P-1                                                                                                            | P-1                                                                                                            | P-1                                                                                                               | P-1                                                                                                            |
| Unit cell dimensions                          | a = 10.0106(2) Å<br>b = 12.9687(4) Å<br>c = 14.2233(5) Å<br>α = 83.910(3)°<br>β = 81.050(2)°<br>γ = 74.464(2)° | a = 8.2908(3) Å<br>b = 5.5316(2) Å<br>c = 25.8750(7) Å<br>α = 90.0°<br>β = 98.688(3)°<br>γ = 90.0° | a = 12.9269(4) Å<br>b = 13.0551(6) Å<br>c = 13.1031(6) Å<br>α = 82.882(4)°<br>β = 63.085(4)°<br>γ = 76.981(3)° | a = 4.9613(3) Å<br>b = 5.5191(3) Å<br>c = 15.1983(8) Å<br>α = 80.741(4)°<br>β = 89.972(5)°<br>γ = 69.536(5)° | a = 12.7395(5) Å<br>b = 12.9755(5) Å<br>c = 13.0231(5) Å<br>α = 65.870(4)°<br>β = 60.907(6)°<br>γ = 72.017(4)° | a = 12.5986(3) Å<br>b = 12.9564(5) Å<br>c = 13.0912(6) Å<br>α = 65.559(4)°<br>β = 61.698(3)°<br>γ = 72.399(3)° | a = 12.5138(5) Å<br>b = 12.8214(6) Å<br>c = 12.9599 (5) Å<br>α = 118.343(4)°<br>β = 106.582(4)°<br>γ = 106.582(4) | a = 12.2887(4) Å<br>b = 12.8724(4) Å<br>c = 13.3577(5) Å<br>α = 88.579(3)°<br>β = 67.420(4)°<br>γ = 62.412(3)° |
| Volume Å <sup>3</sup>                         | 1753.37(9)                                                                                                     | 1173.05(7)                                                                                         | 1920.48(15)                                                                                                    | 384.12(4)                                                                                                    | 1700.36(14)                                                                                                    | 1696.48(12)                                                                                                    | 1669.22(14)                                                                                                       | 1698.69(12)                                                                                                    |
| Z                                             | 2                                                                                                              | 8                                                                                                  | 1                                                                                                              | 2                                                                                                            | 2                                                                                                              | 2                                                                                                              | 2                                                                                                                 | 2                                                                                                              |
| ρ <sub>calc</sub> g/cm <sup>3</sup>           | 1.444                                                                                                          | 2.536                                                                                              | 1.294                                                                                                          | 2.187                                                                                                        | 1.460                                                                                                          | 1.436                                                                                                          | 1.371                                                                                                             | 1.375                                                                                                          |
| μ mm <sup>-1</sup>                            | 0.706                                                                                                          | 3.360                                                                                              | 0.644                                                                                                          | 2.585                                                                                                        | 0.726                                                                                                          | 0.724                                                                                                          | 0.786                                                                                                             | 0.776                                                                                                          |
| F(000)                                        | 784.0                                                                                                          | 864.0                                                                                              | 767.0                                                                                                          | 248.0                                                                                                        | 768.0                                                                                                          | 756.0                                                                                                          | 720.0                                                                                                             | 732.0                                                                                                          |
| Crystal size                                  | 0.04 × 0.08 × 0.12                                                                                             | 0.06 × 0.07 × 0.08                                                                                 | 0.05 × 0.06 × 0.08                                                                                             | 0.02 × 0.02 × 0.09                                                                                           | 0.07 × 0.08 × 0.10                                                                                             | 0.06 × 0.09 × 0.11                                                                                             | 0.05 × 0.08 × 0.09                                                                                                | 0.08 × 0.11 × 0.15                                                                                             |
| 2θ range for data collection                  | 4.66 to 58.74°                                                                                                 | 6.372 to 58.834°                                                                                   | 5.258 to 59.064°                                                                                               | 5.442 to 58.23°                                                                                              | 4.708 to 59.028°                                                                                               | 4.742 to 59.074°                                                                                               | 4.816 to 59.196°                                                                                                  | 5.394 to 58.94°                                                                                                |
| Reflections collected                         | 17951                                                                                                          | 5512                                                                                               | 18040                                                                                                          | 3157                                                                                                         | 16249                                                                                                          | 15388                                                                                                          | 15962                                                                                                             | 16361                                                                                                          |
| Independent reflections                       | 8122<br>[R <sub>int</sub> = 0.0254]                                                                            | 1416<br>[R <sub>int</sub> = 0.0166]                                                                | 8837<br>[R <sub>int</sub> = 0.0258]                                                                            | 1764<br>R <sub>int</sub> = 0.0319]                                                                           | 7873<br>[R <sub>int</sub> = 0.0268]                                                                            | 7772<br>[R <sub>int</sub> = 0.0255]                                                                            | 7719<br>[R <sub>int</sub> = 0.0280]                                                                               | 7864<br>[R <sub>int</sub> = 0.0255]                                                                            |
| Data/restraints/parameters                    | 8122/0/433                                                                                                     | 1416/0/83                                                                                          | 8837/54/518                                                                                                    | 1764/0/95                                                                                                    | 7873/0/425                                                                                                     | 7772/0/416                                                                                                     | 7719/0/416                                                                                                        | 7864/0/425                                                                                                     |
| Goodness-of-fit on F <sup>2</sup>             | 1.036                                                                                                          | 1.092                                                                                              | 1.039                                                                                                          | 1.076                                                                                                        | 1.045                                                                                                          | 1.047                                                                                                          | 1.033                                                                                                             | 1.033                                                                                                          |
| Final R indices [ <i>I</i> > 2σ( <i>I</i> )]  | R <sub>1</sub> = 0.0297<br>wR <sub>2</sub> = 0.0627                                                            | R <sub>1</sub> = 0.0135<br>wR <sub>2</sub> = 0.0302                                                | R <sub>1</sub> = 0.0304<br>wR <sub>2</sub> = 0.0652                                                            | R <sub>1</sub> = 0.0454<br>wR <sub>2</sub> = 0.1138                                                          | R <sub>1</sub> = 0.0285<br>wR <sub>2</sub> = 0.0592                                                            | R <sub>1</sub> = 0.0285<br>wR <sub>2</sub> = 0.0584                                                            | R <sub>1</sub> = 0.0328<br>wR <sub>2</sub> = 0.0745                                                               | R <sub>1</sub> = 0.0337<br>wR <sub>2</sub> = 0.0806                                                            |
| Largest difference peak/hole e/Å <sup>3</sup> | 0.74/-0.35                                                                                                     | 0.47/-0.27                                                                                         | 0.42/-0.65                                                                                                     | 1.81/-1.88                                                                                                   | 0.43/-0.37                                                                                                     | 0.54/-0.41                                                                                                     | 0.45/-0.37                                                                                                        | 0.68/-0.29                                                                                                     |

## NMR- and IR-spectra of the polymeric silver(I) carboxylates.

### ATR-IR-spectrum of (1)

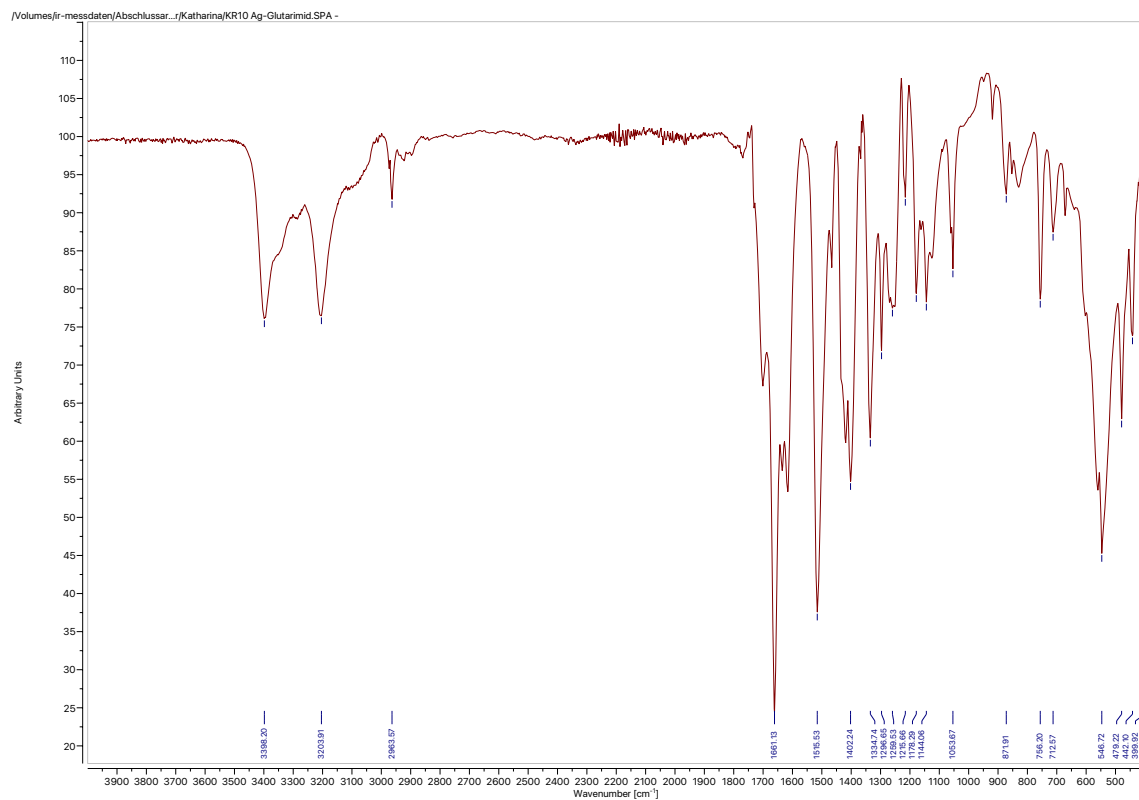

### ATR-IR-spectrum of (2)

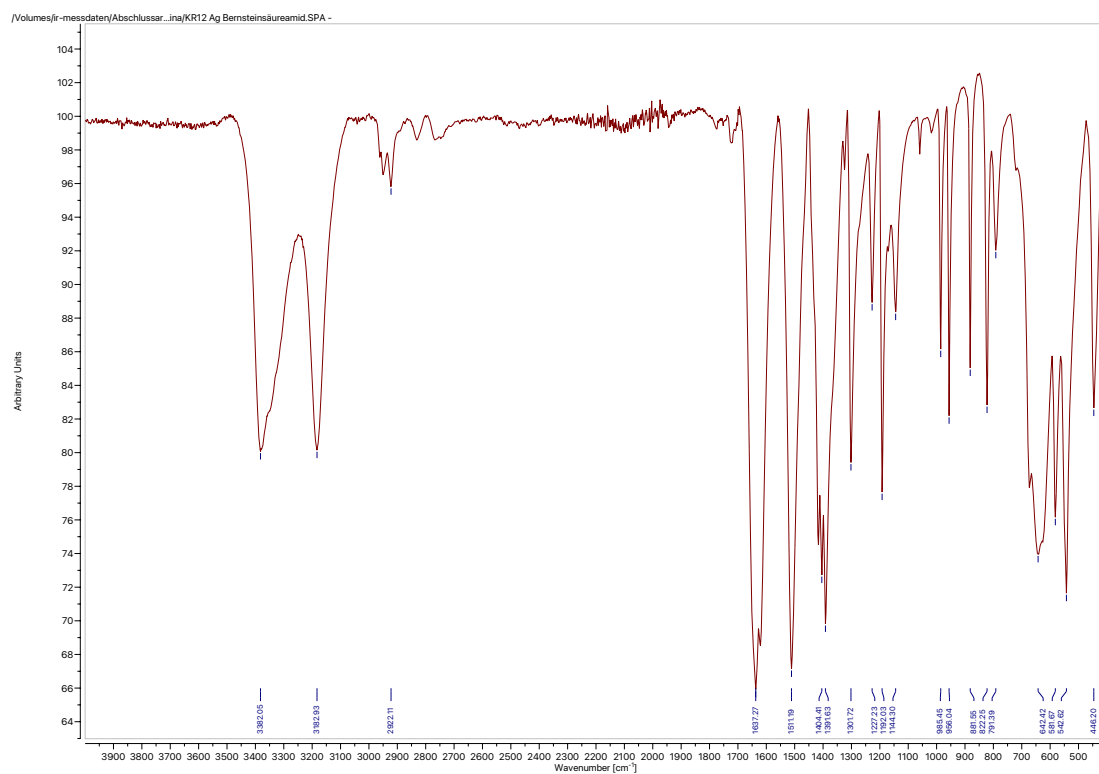

## ATR-IR-spectrum of (3)

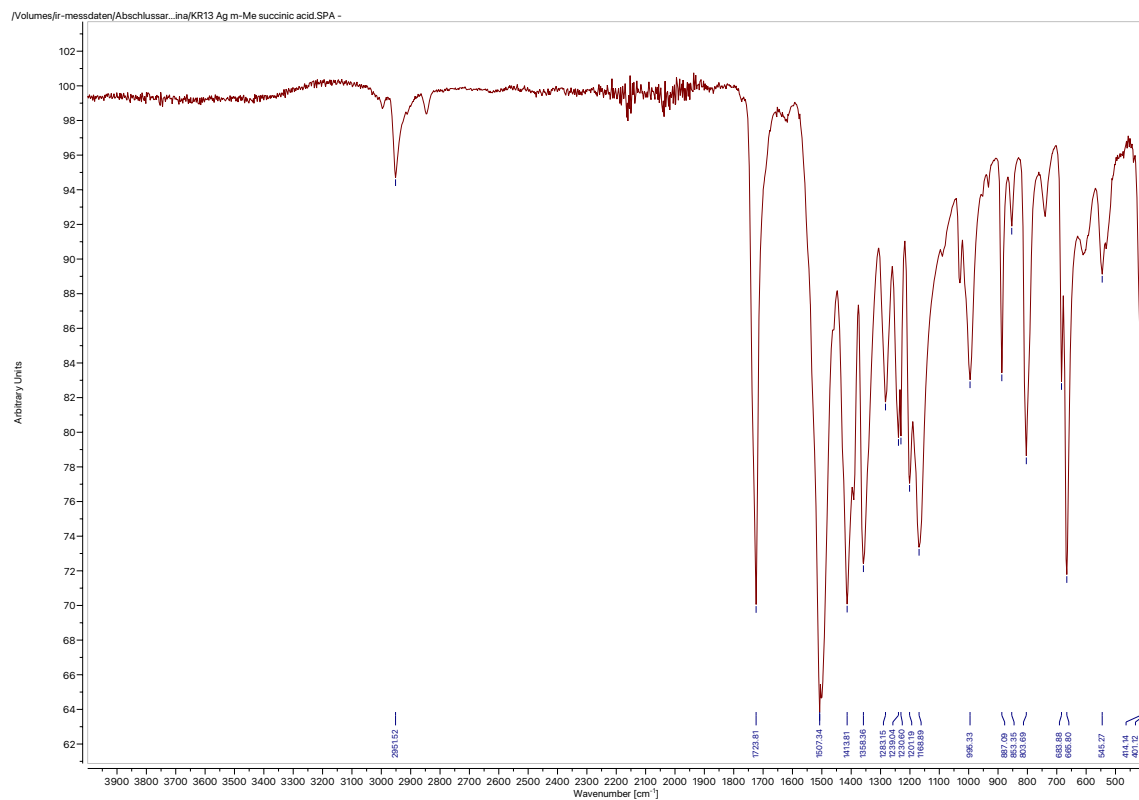

## <sup>1</sup>H-NMR spectrum of (3) in D<sub>2</sub>O

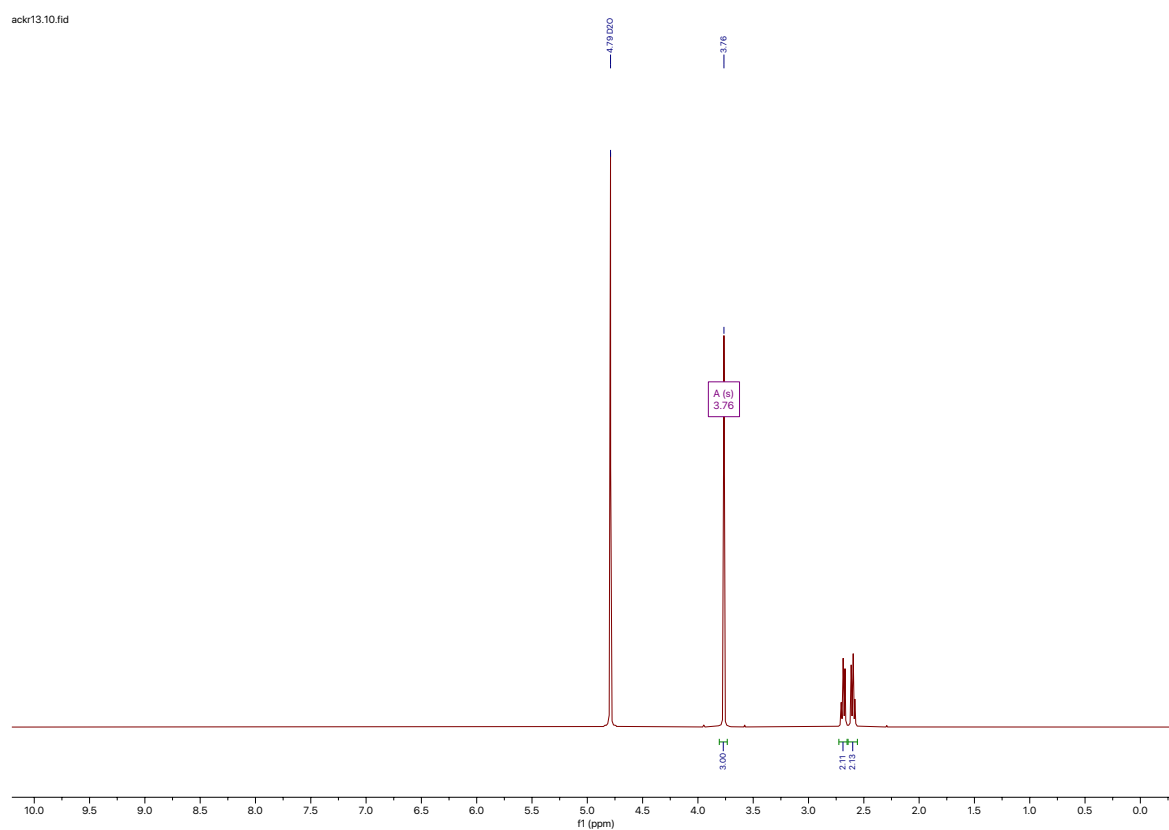

## $^{13}\text{C}$ -NMR spectrum of (3) in $\text{D}_2\text{O}$

ackr13.11.fid

\*\*\*\* Das Spektrum konnte nicht auf TMS referenziert werden \*\*\*\*

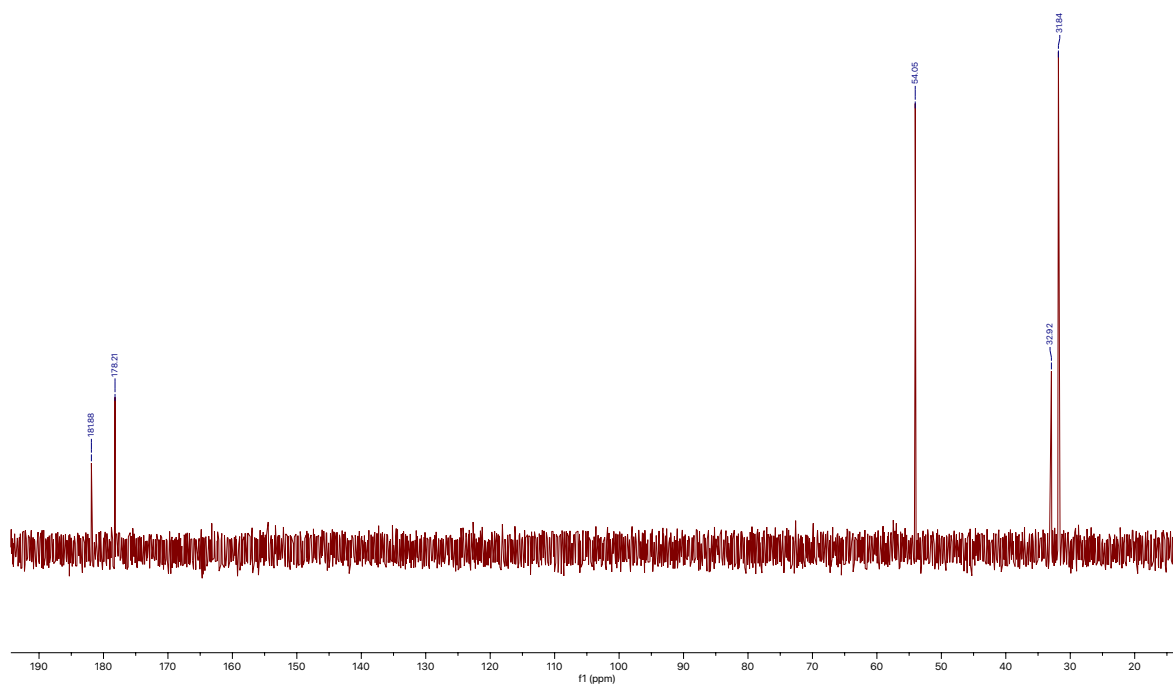

## ATR-IR-spectrum of (4)

/Volumes/ir-messdaten/Abschlussar...tharina/KR11 Ag m-Me Glutarate SPA -

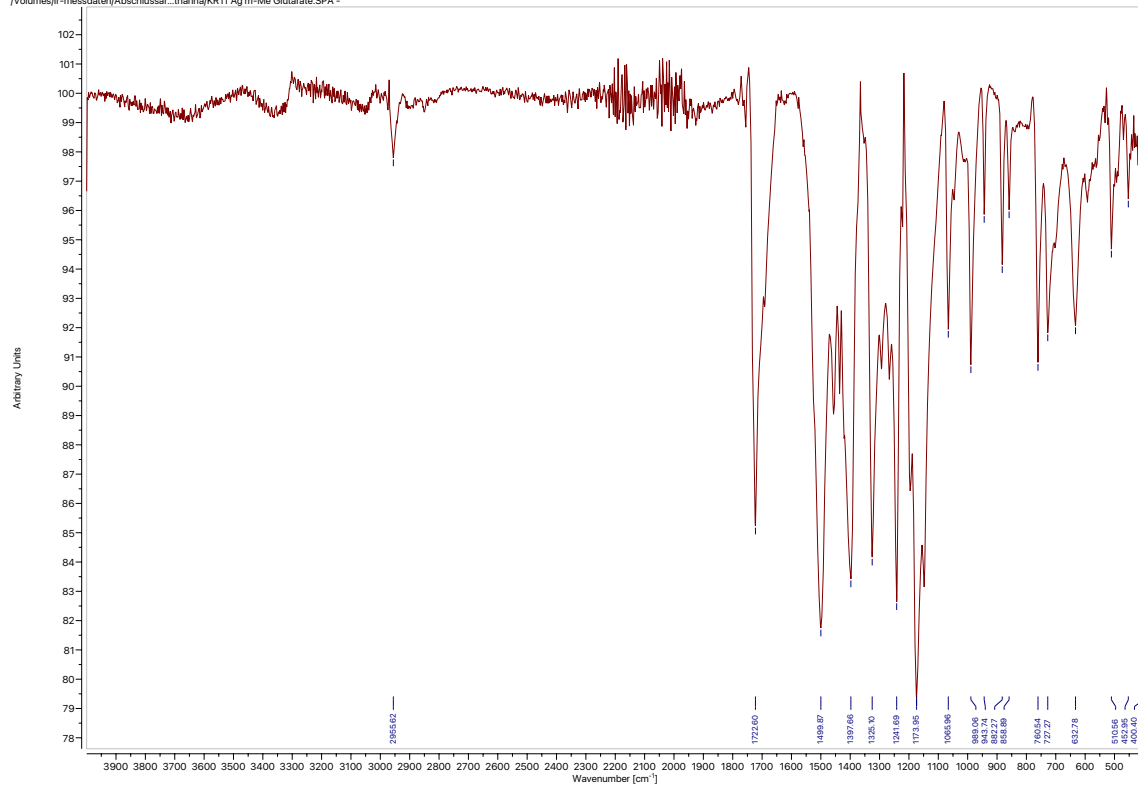

## ATR-IR-spectrum of (5)

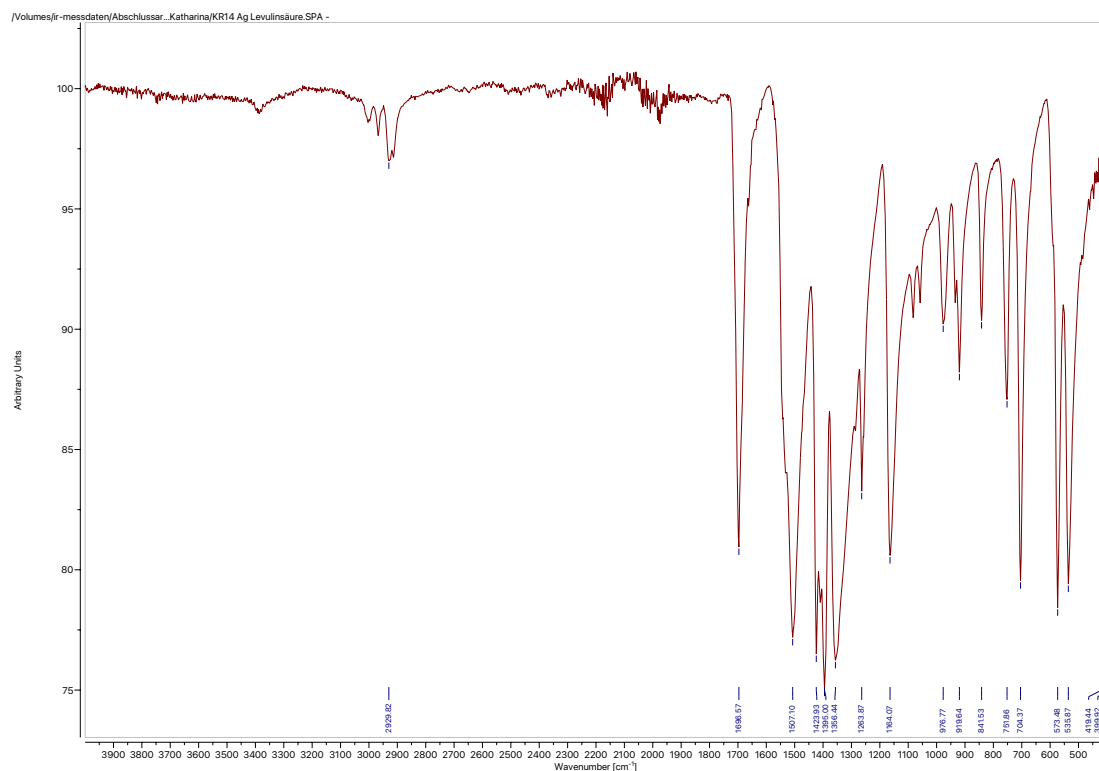

## ATR-IR-spectrum of (6)

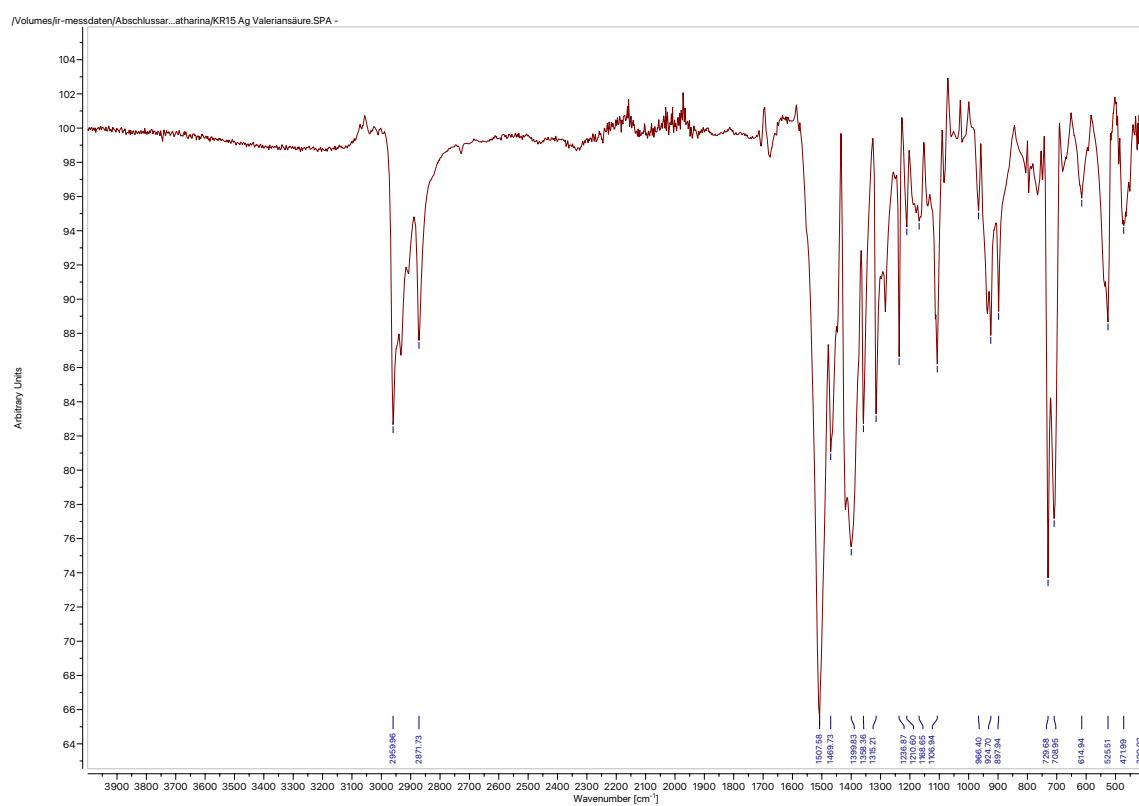

## NMR- and IR-spectra of the bis(triphenylphosphine) silver(I) complexes.

### ATR-IR-spectrum of (1a)

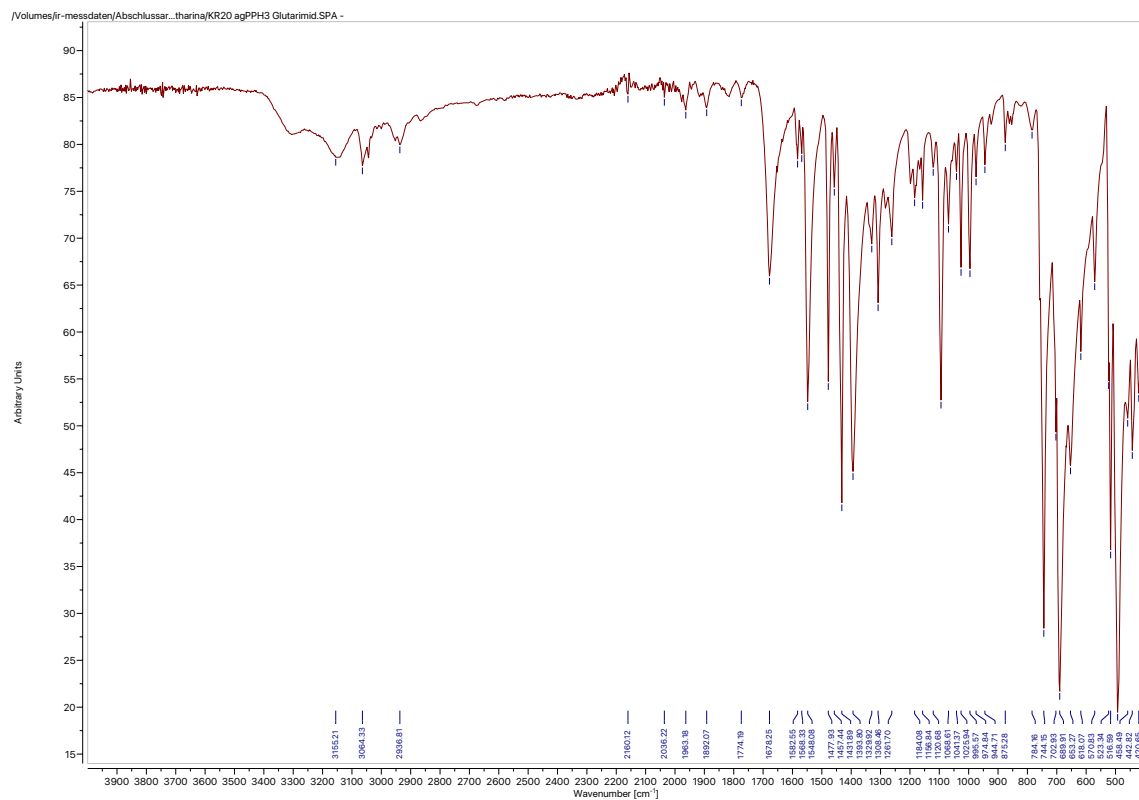

### ATR-IR-spectrum of (2a)

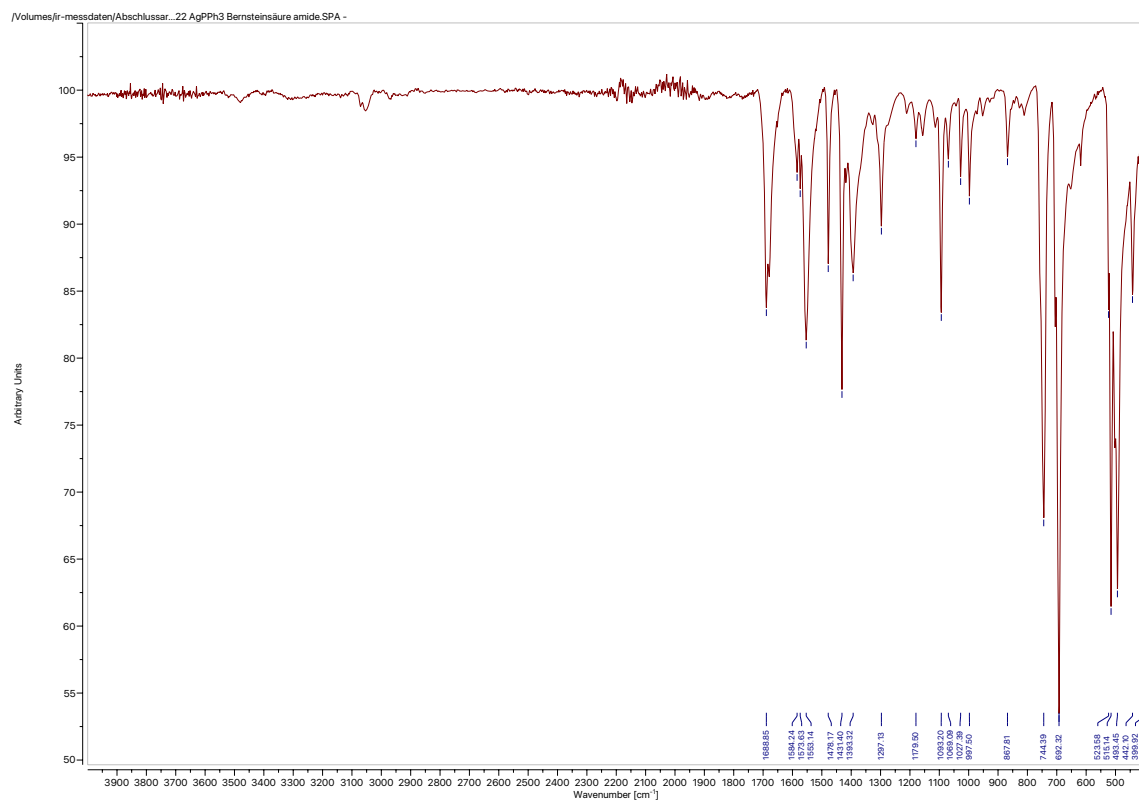

ATR-IR-spectrum of (3a)

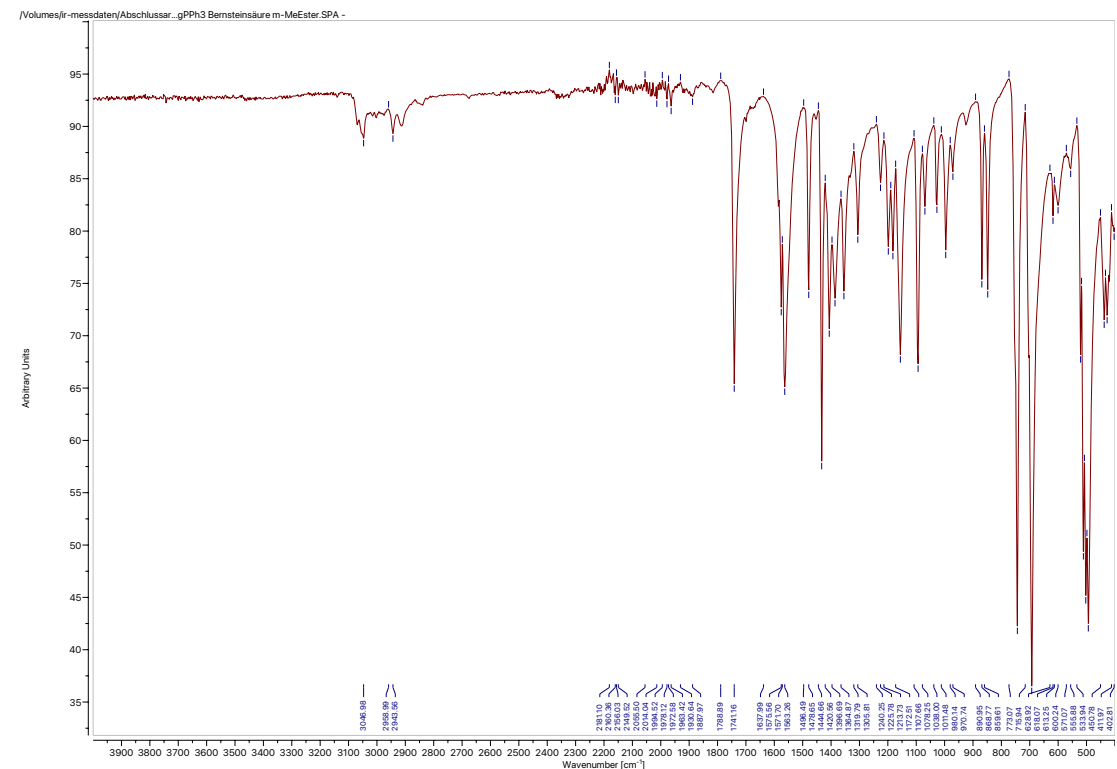

ATR-IR-spectrum of (4a)

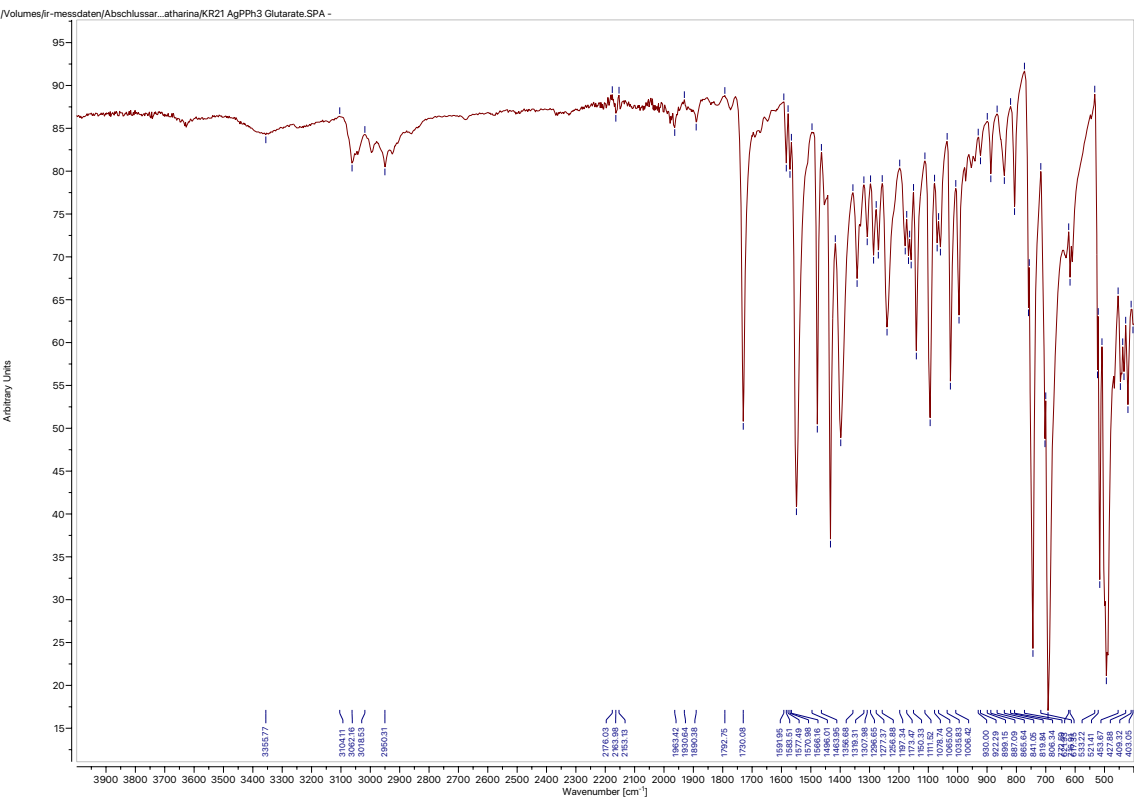



## ATR-IR-spectrum of (5a)

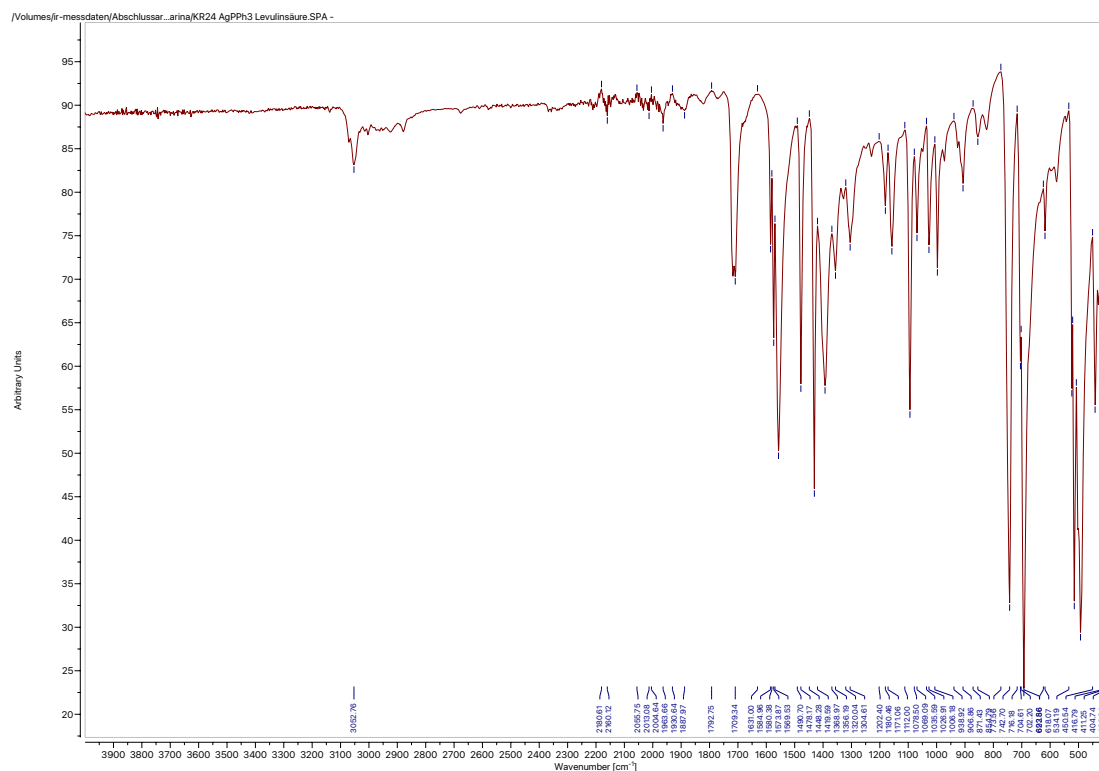

## ATR-IR-spectrum of (6a)

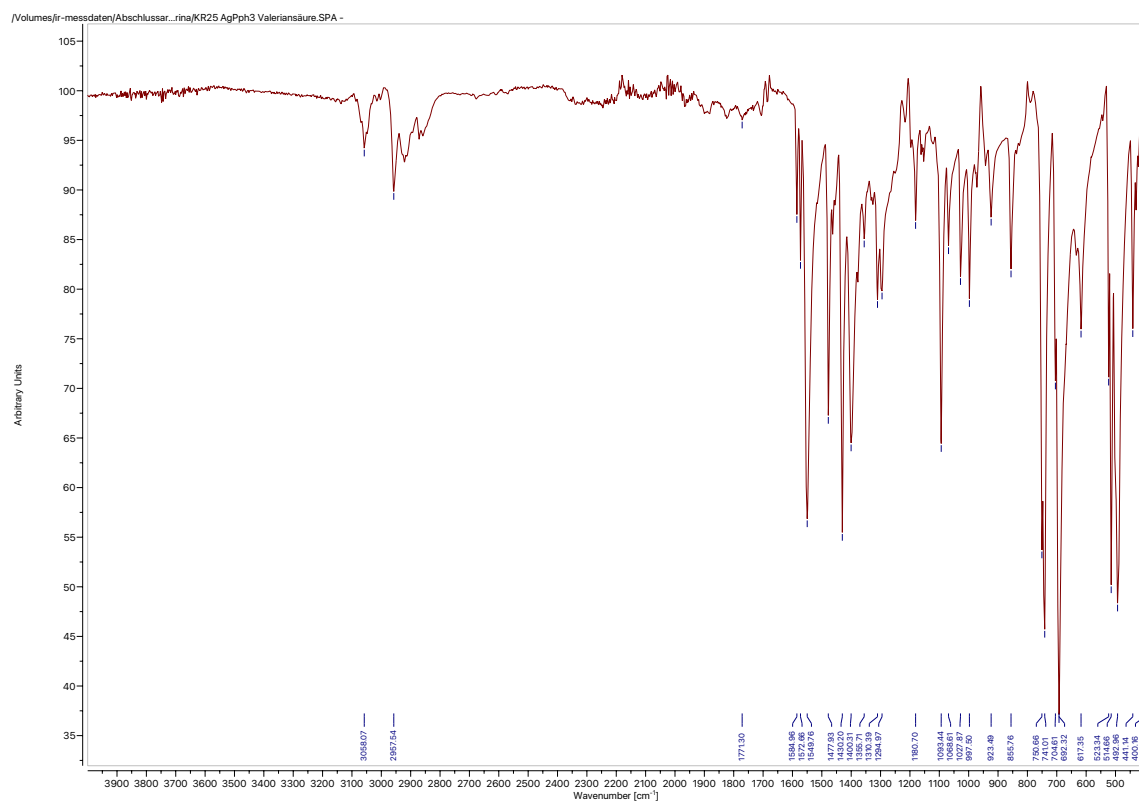

$^1\text{H}$ -NMR spectrum of (**1a**) in  $\text{CD}_2\text{Cl}_2$

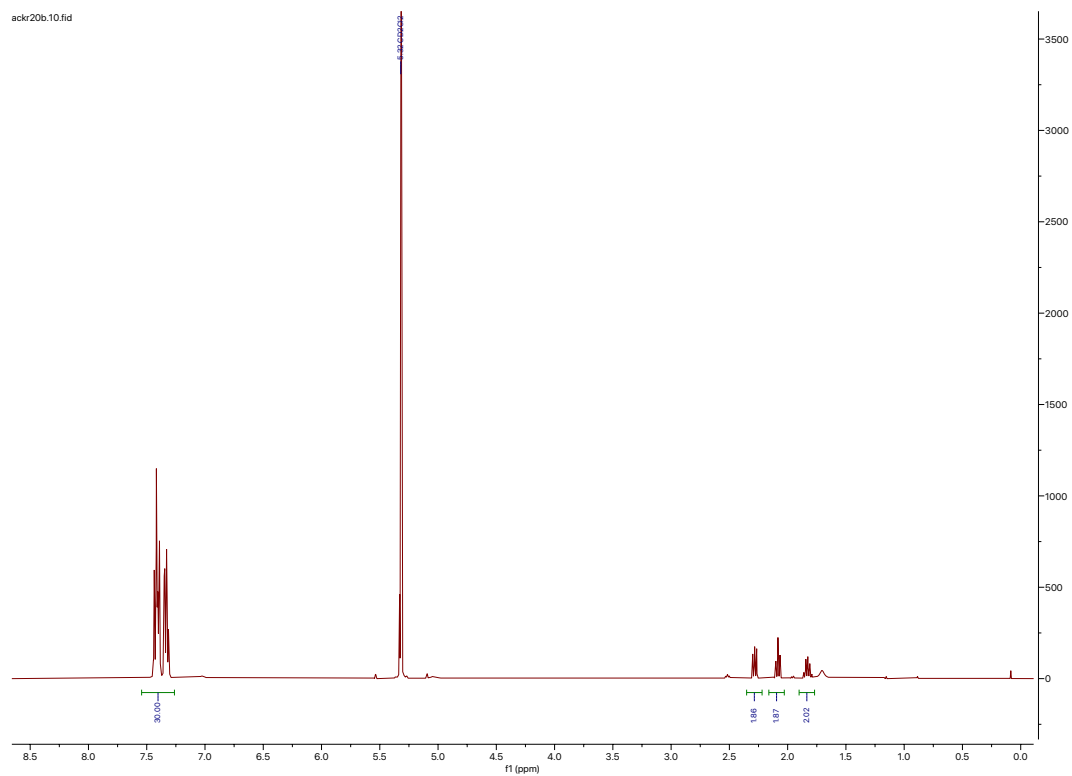

$^{31}\text{P}$ -NMR spectrum of (**1a**) in  $\text{CD}_2\text{Cl}_2$

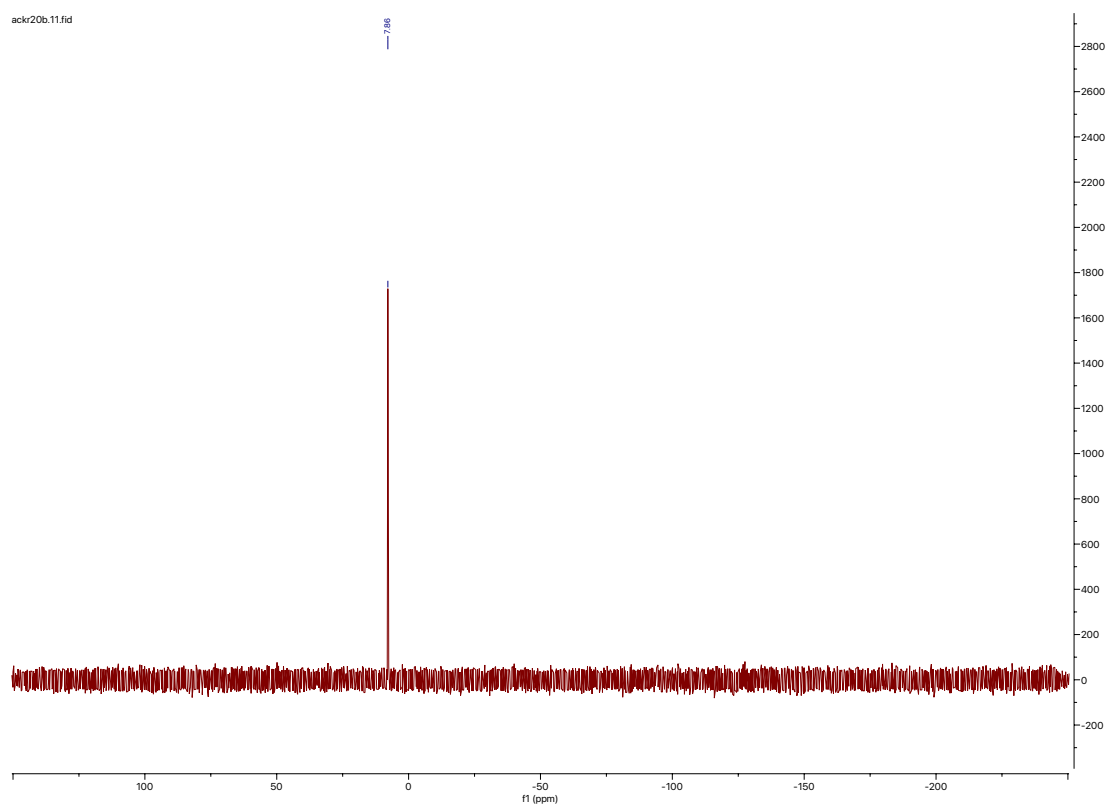

$^{13}\text{C}$ -NMR spectrum of (**1a**) in  $\text{CD}_2\text{Cl}_2$

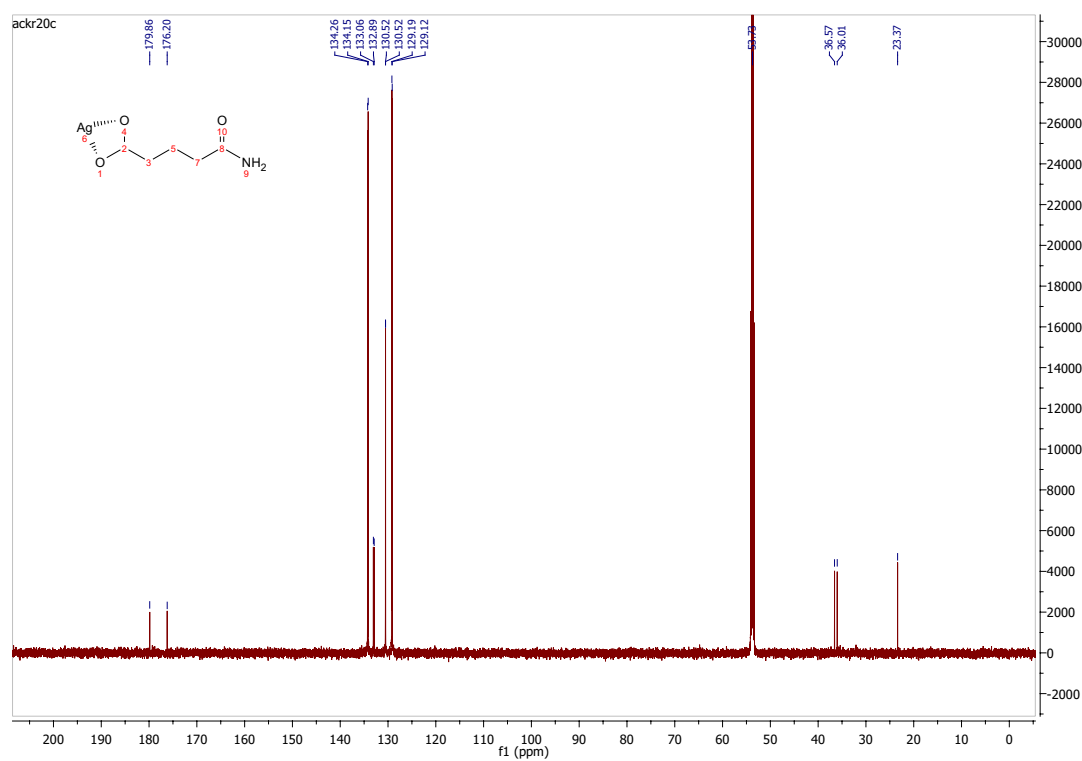

$^1\text{H}$ -NMR spectrum of (**2a**) in  $\text{CD}_2\text{Cl}_2$

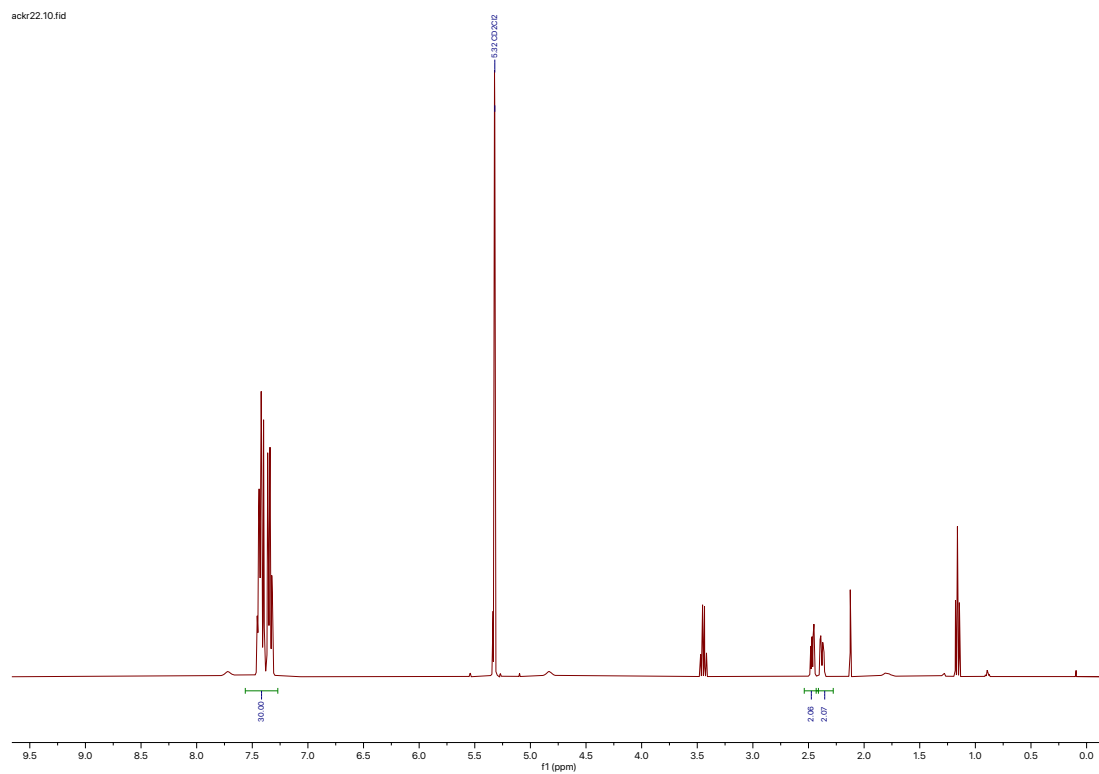

$^{31}\text{P}$ -NMR spectrum of (**2a**) in  $\text{CD}_2\text{Cl}_2$

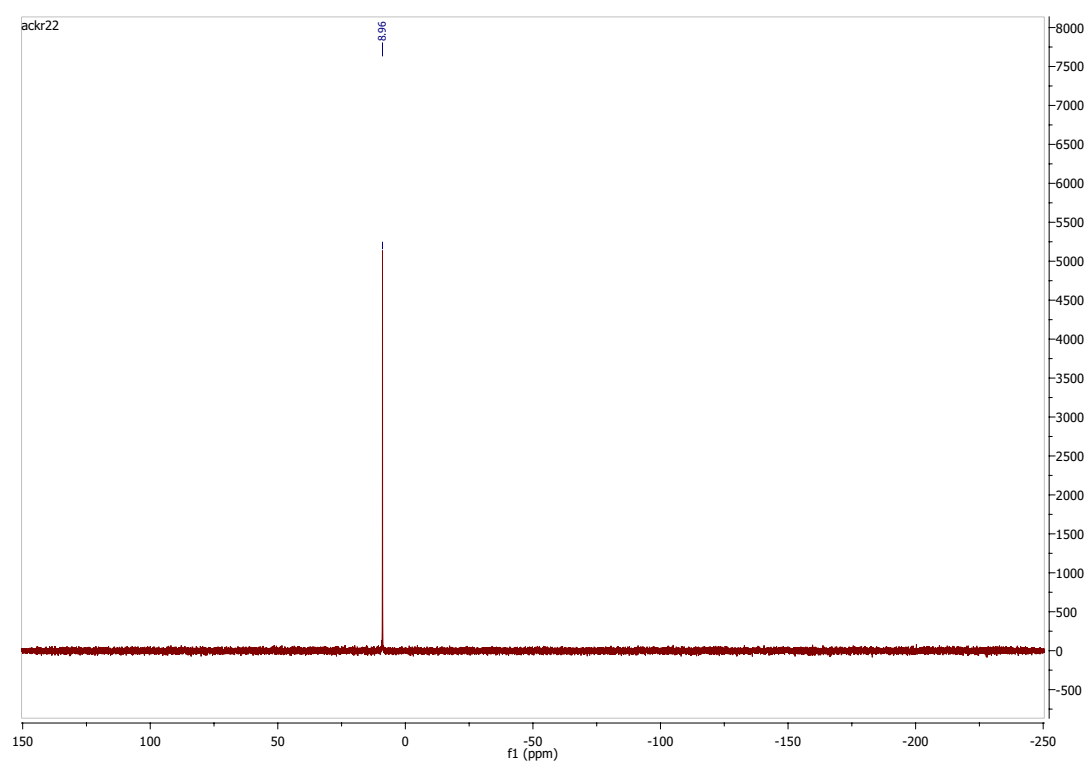

$^{13}\text{C}$ -NMR spectrum of (**2a**) in  $\text{CD}_2\text{Cl}_2$

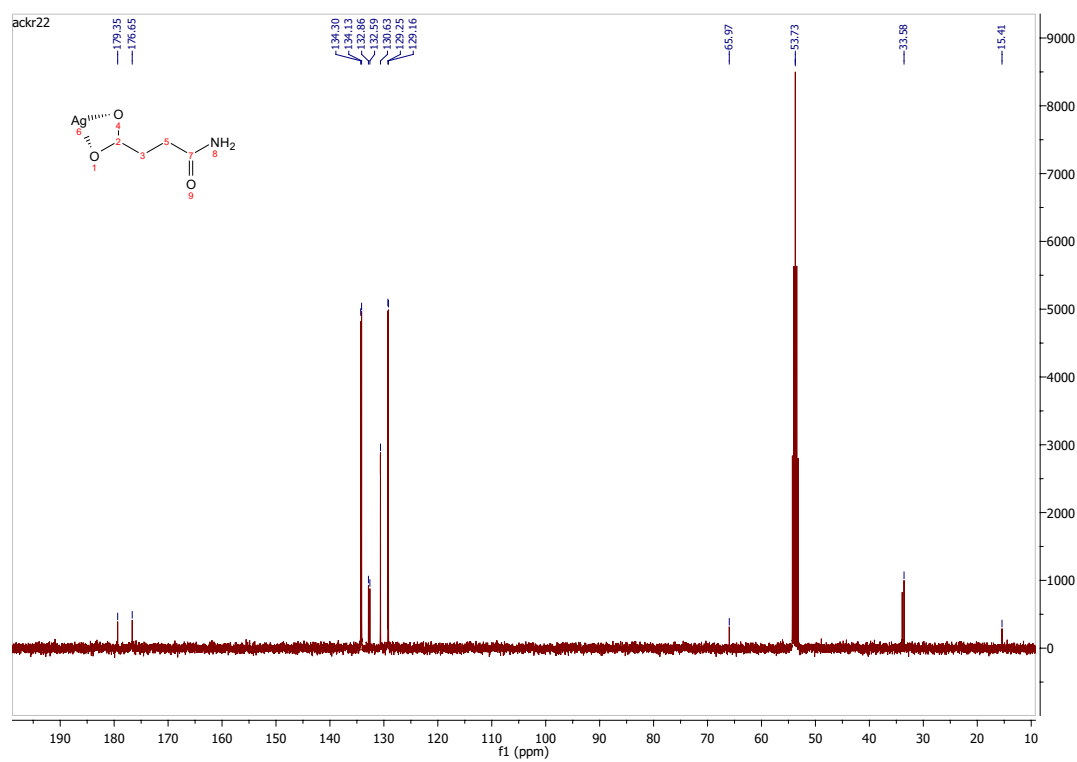

$^1\text{H}$ -NMR spectrum of (**3a**) in  $\text{CD}_2\text{Cl}_2$

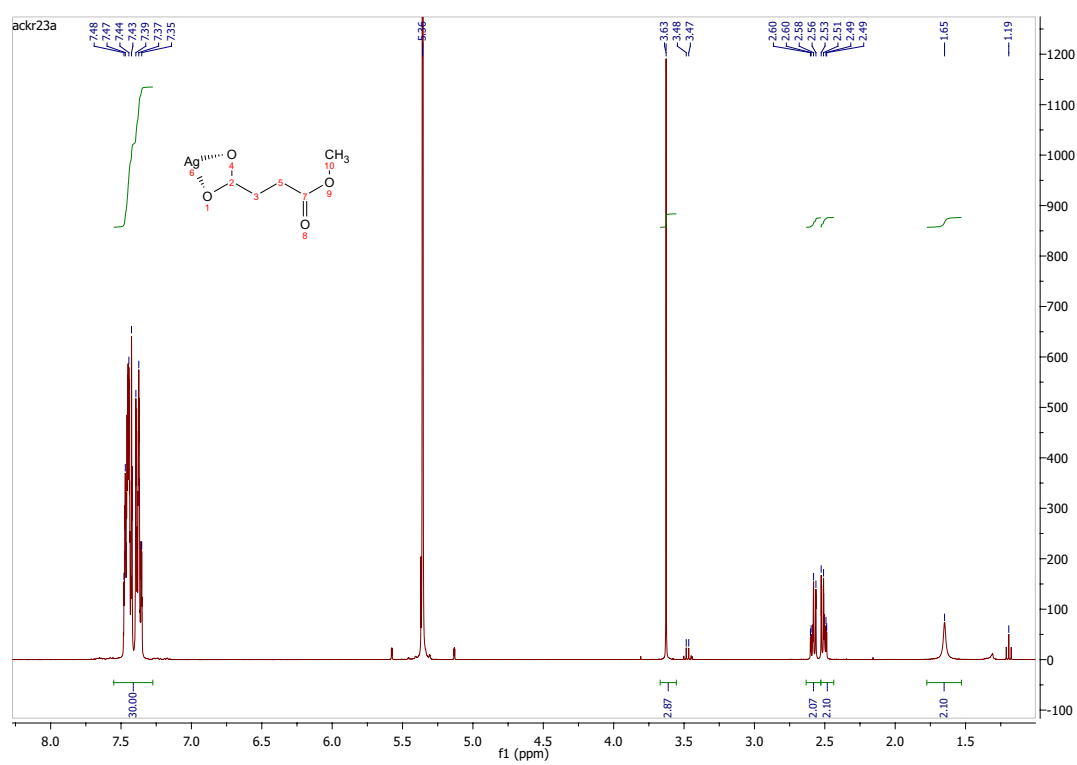

$^{31}\text{P}$ -NMR spectrum of (**3a**) in  $\text{CD}_2\text{Cl}_2$

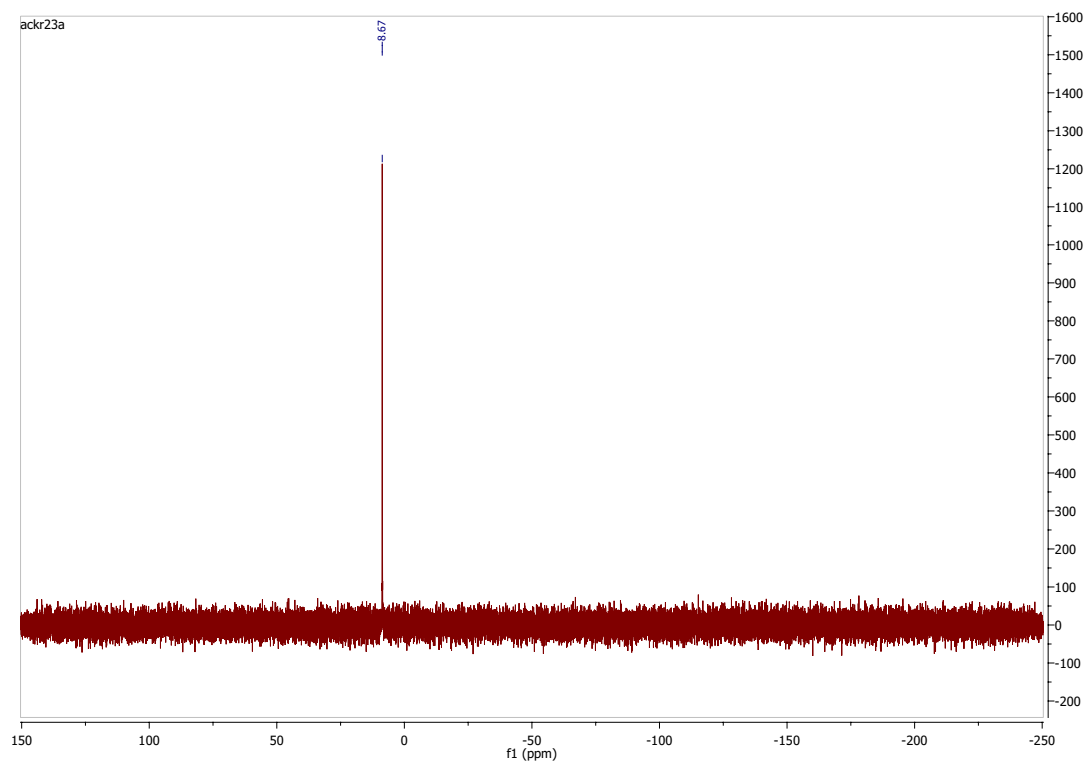

$^{13}\text{C}$ -NMR spectrum of (**3a**) in  $\text{CD}_2\text{Cl}_2$

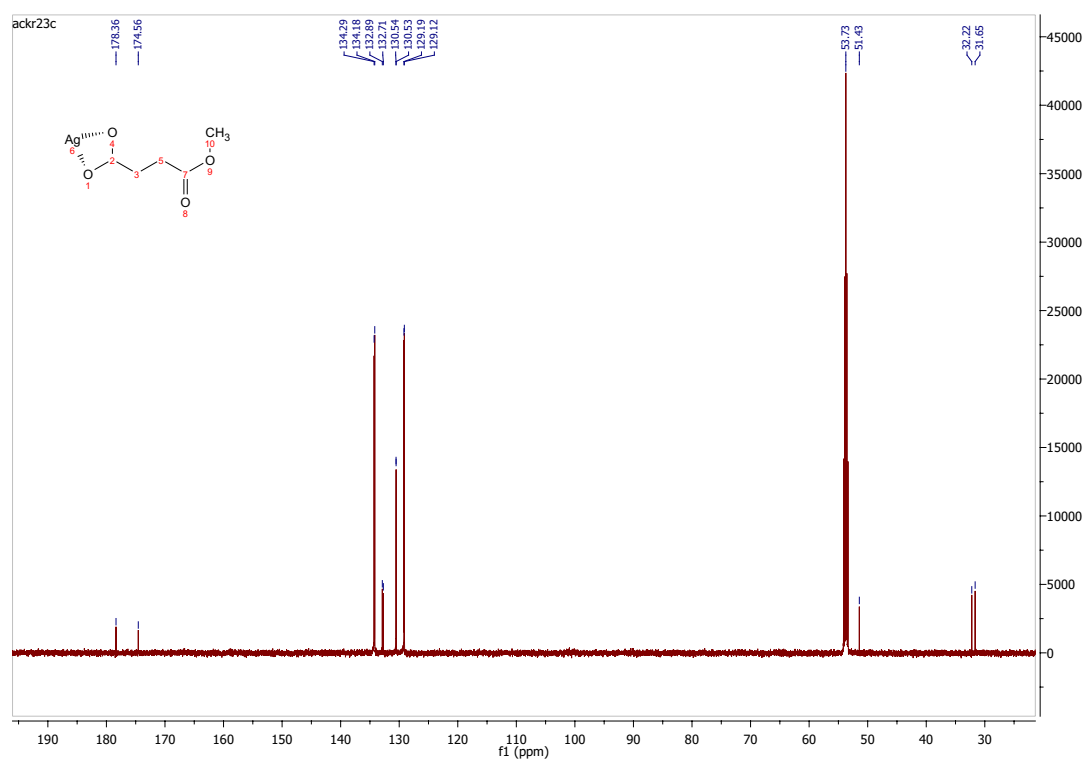

$^1\text{H}$ -NMR spectrum of (**4a**) in  $\text{CD}_2\text{Cl}_2$

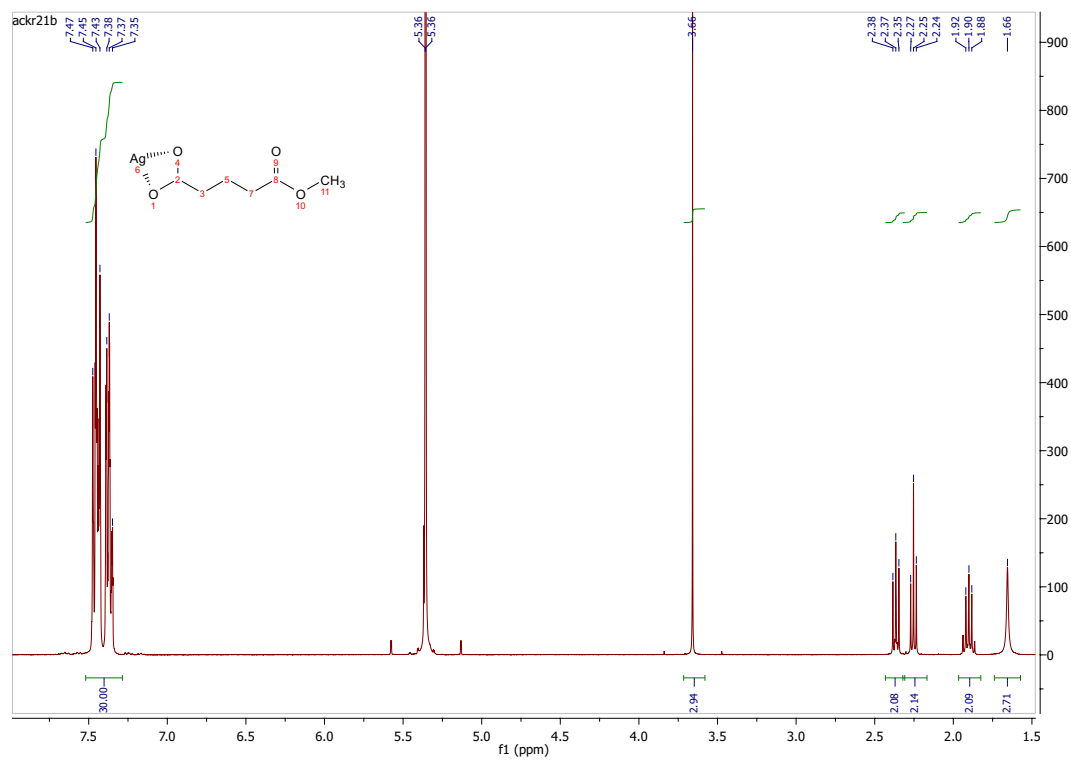

$^{31}\text{P}$ -NMR spectrum of (**4a**) in  $\text{CD}_2\text{Cl}_2$

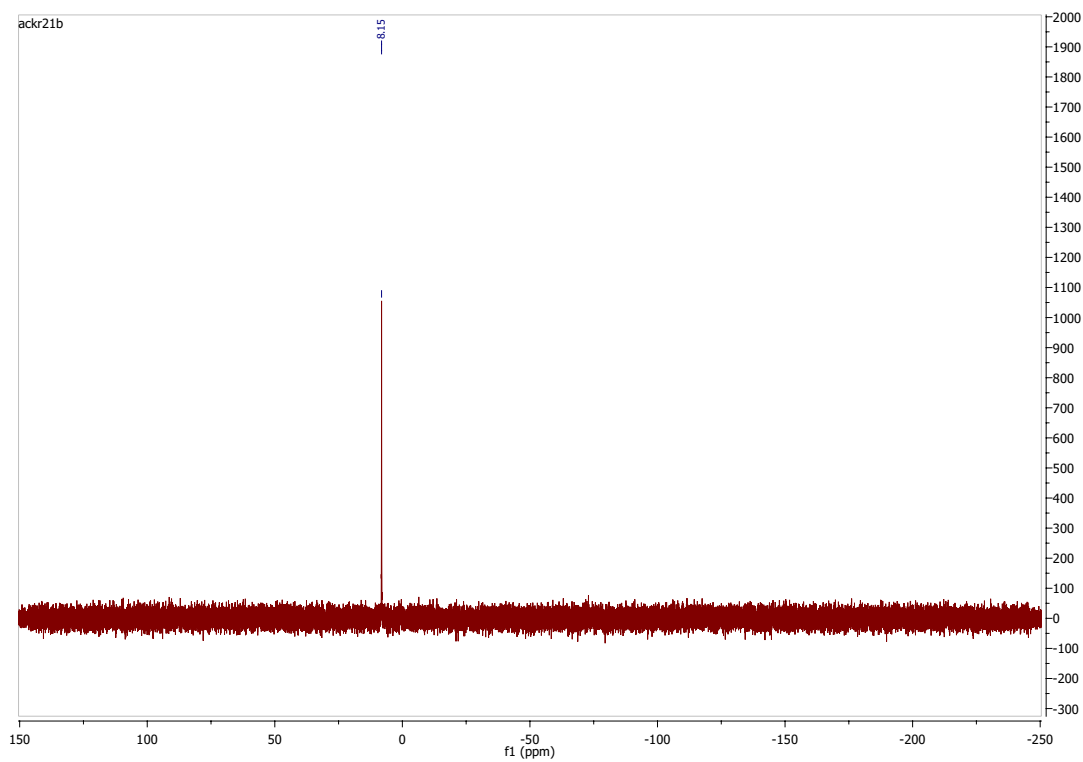

$^{13}\text{C}$ -NMR spectrum of (**4a**) in  $\text{CD}_2\text{Cl}_2$

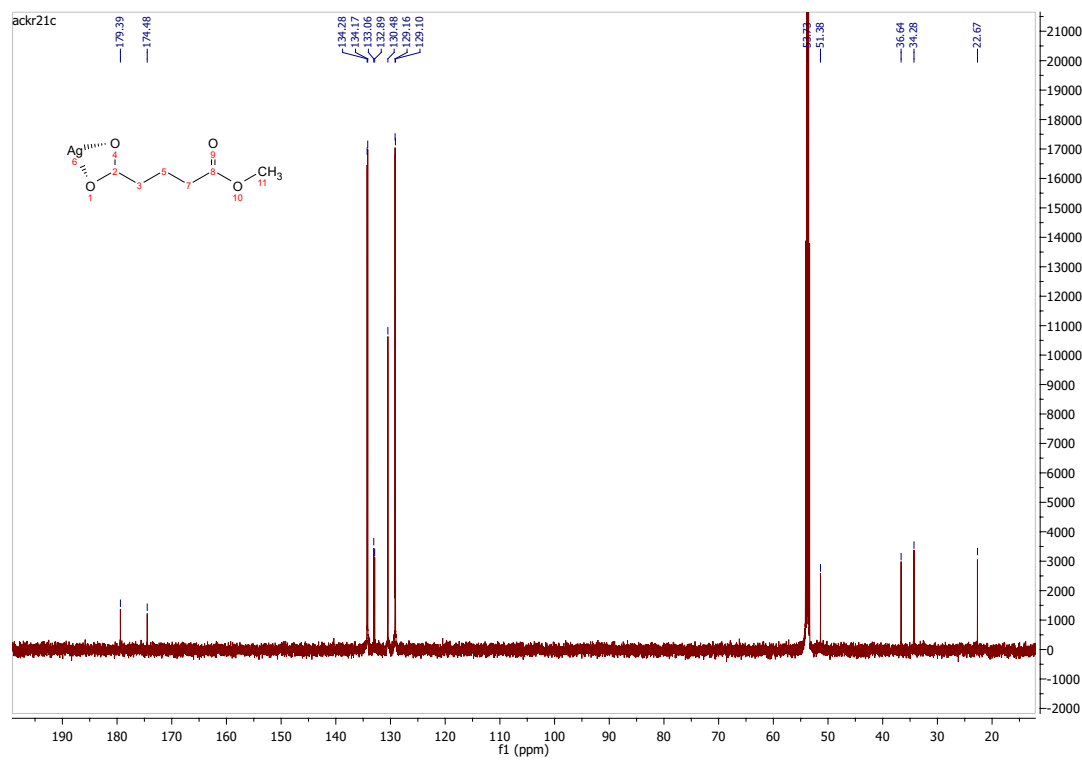

$^1\text{H}$ -NMR spectrum of (**5a**) in  $\text{CD}_2\text{Cl}_2$

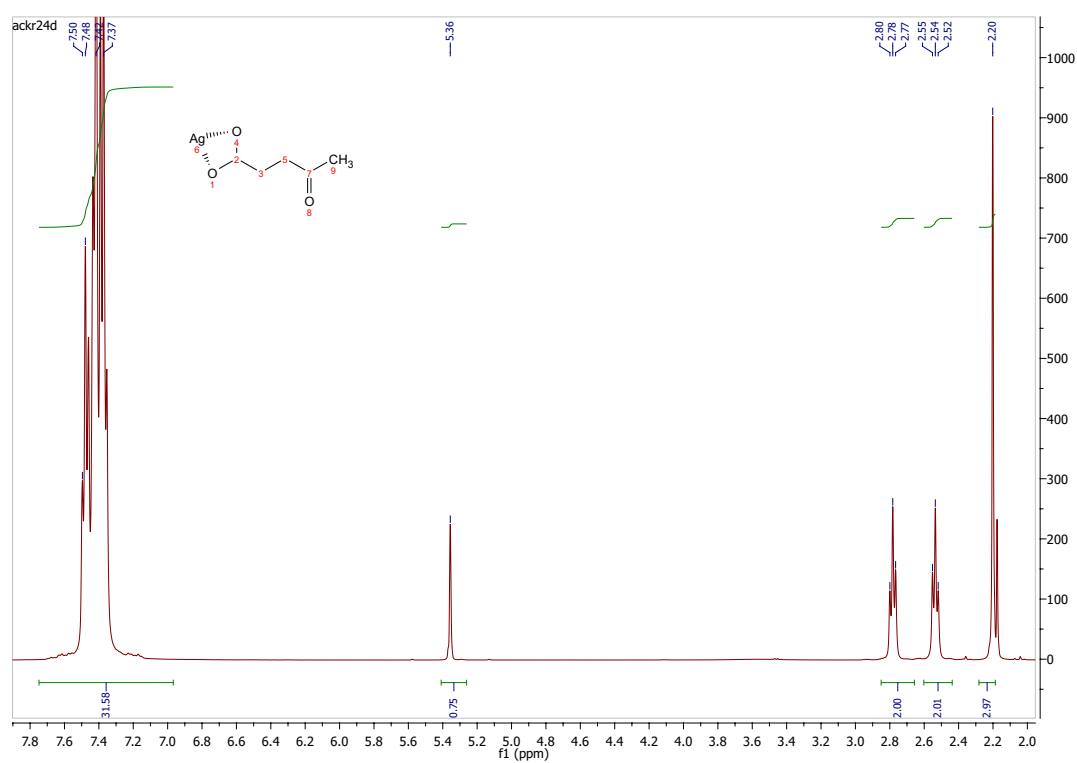

$^{31}\text{P}$ -NMR spectrum of (**5a**) in  $\text{CD}_2\text{Cl}_2$

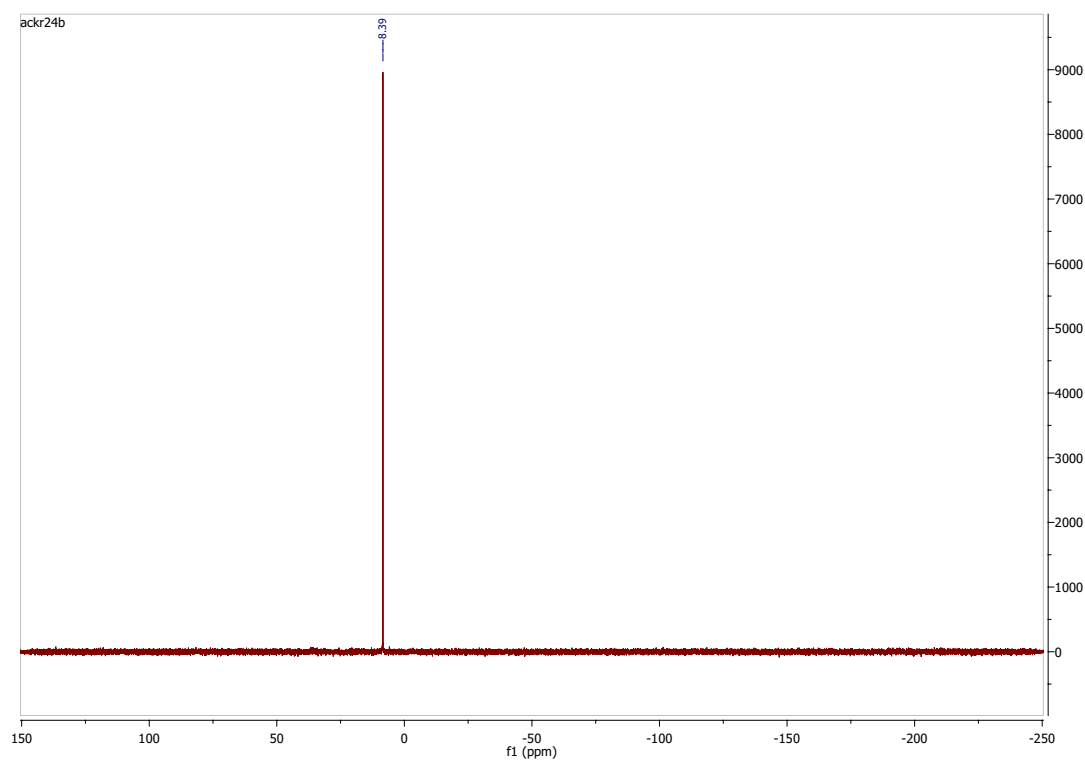



$^{13}\text{C}$ -NMR spectrum of (**5a**) in  $\text{CD}_2\text{Cl}_2$

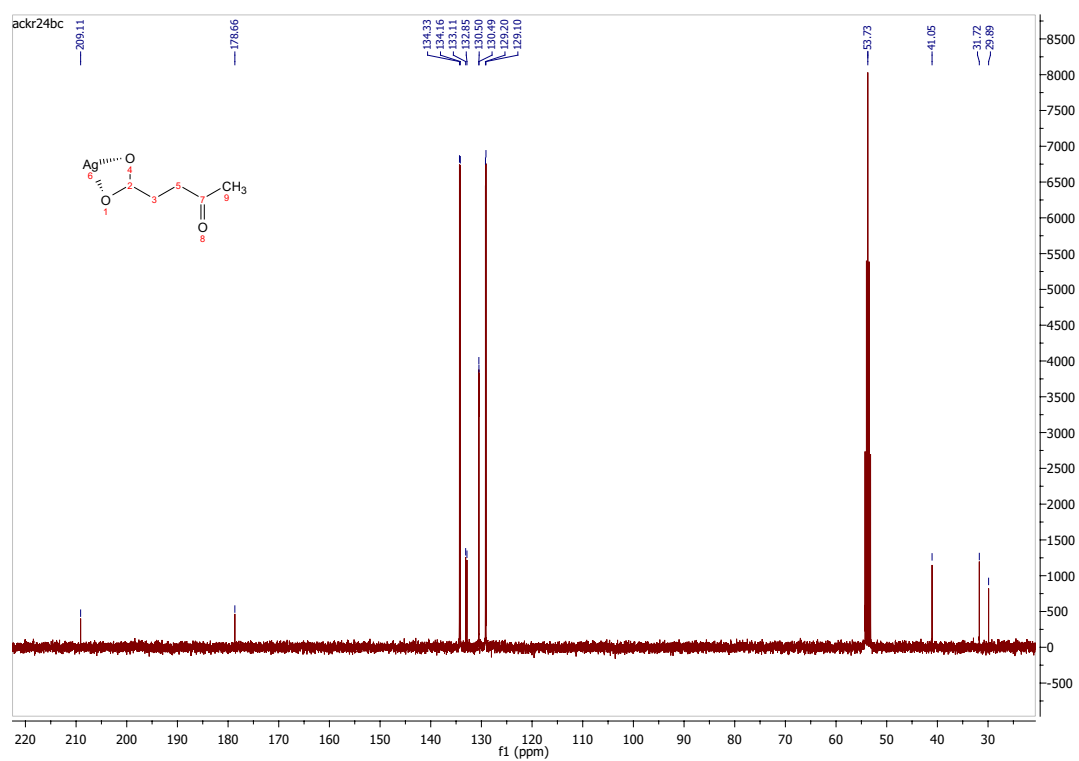

$^1\text{H}$ -NMR spectrum of (**6a**) in  $\text{CD}_2\text{Cl}_2$

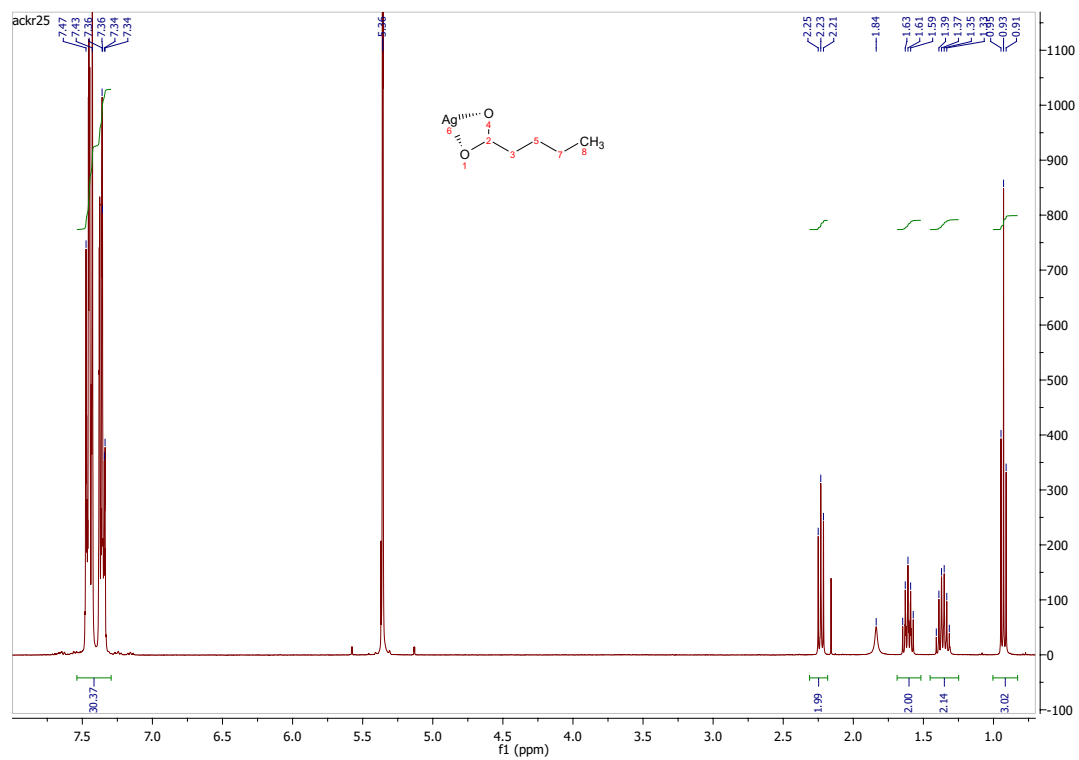

$^{31}\text{P}$ -NMR spectrum of (**6a**) in  $\text{CD}_2\text{Cl}_2$

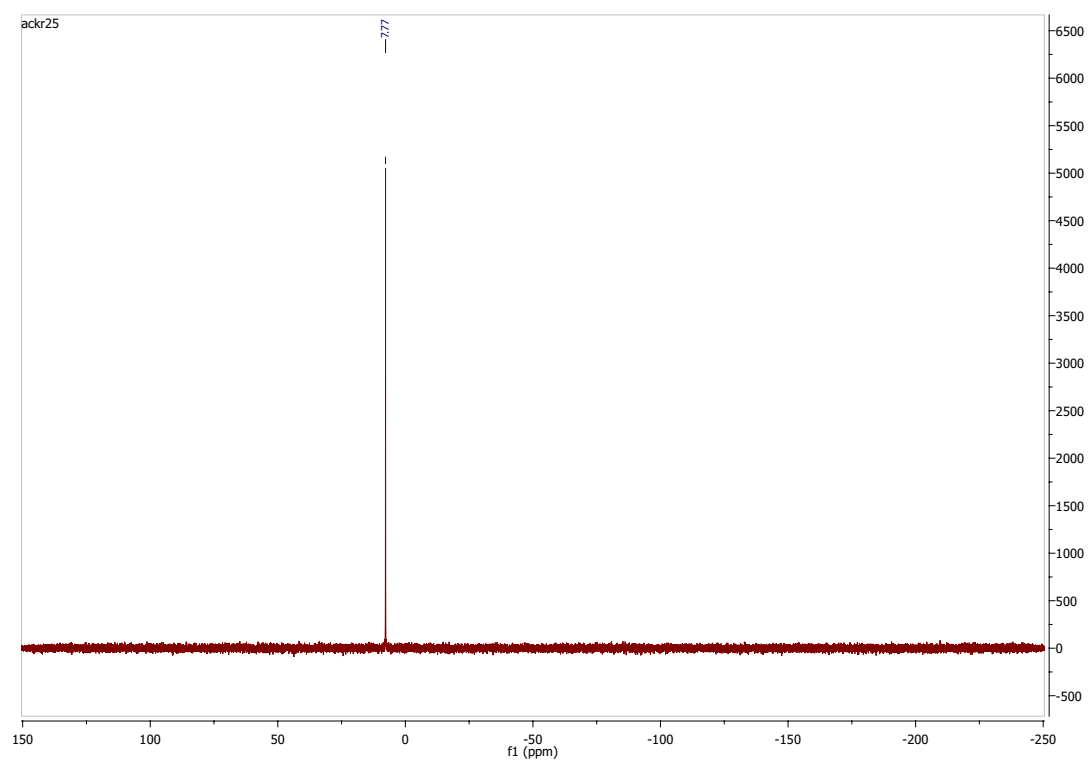

$^{13}\text{C}$ -NMR spectrum of (**6a**) in  $\text{CD}_2\text{Cl}_2$

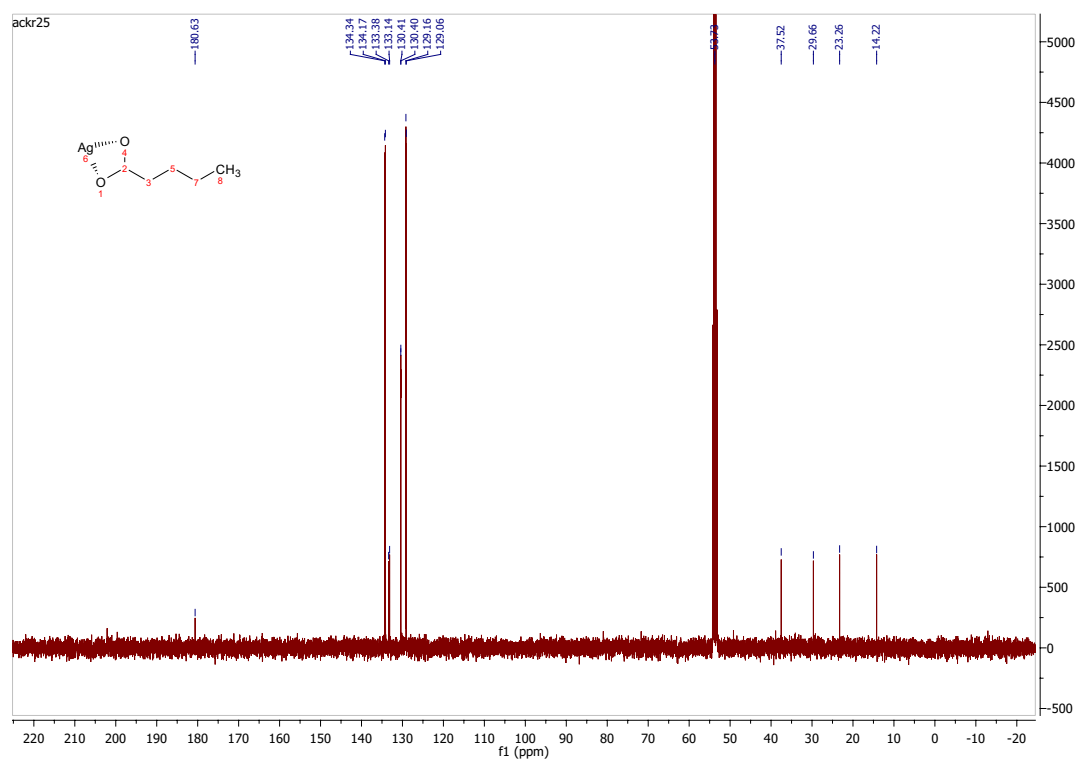

## NMR- and IR-spectra of the bis(triphenylphosphine) copper(I) complexes.

ATR-IR-spectrum of (7a)

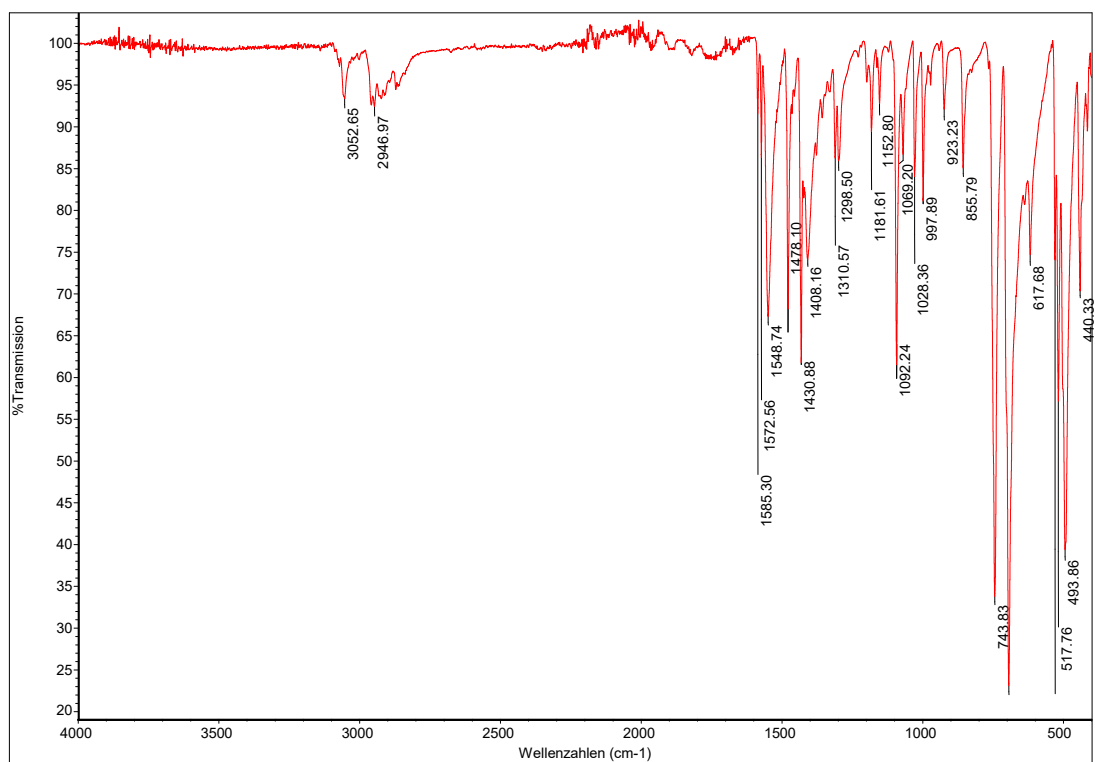

ATR-IR-spectrum of (8a)

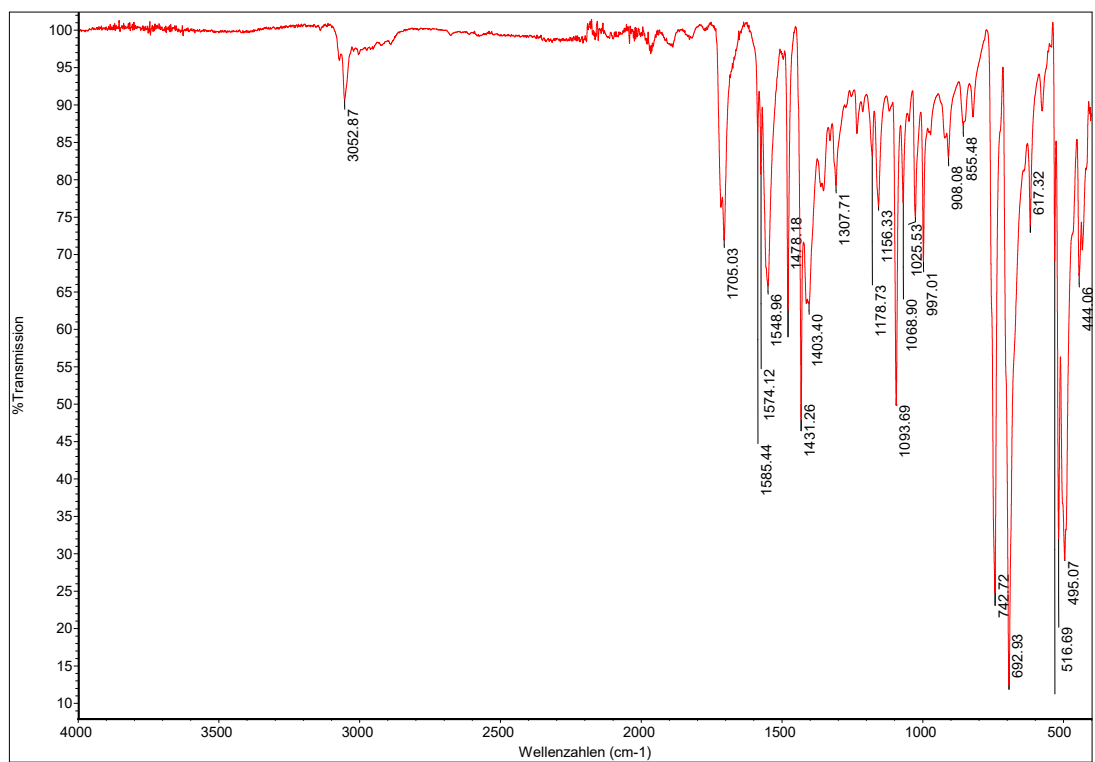

$^1\text{H}$ -NMR spectrum of (**7a**) in  $\text{CD}_2\text{Cl}_2$

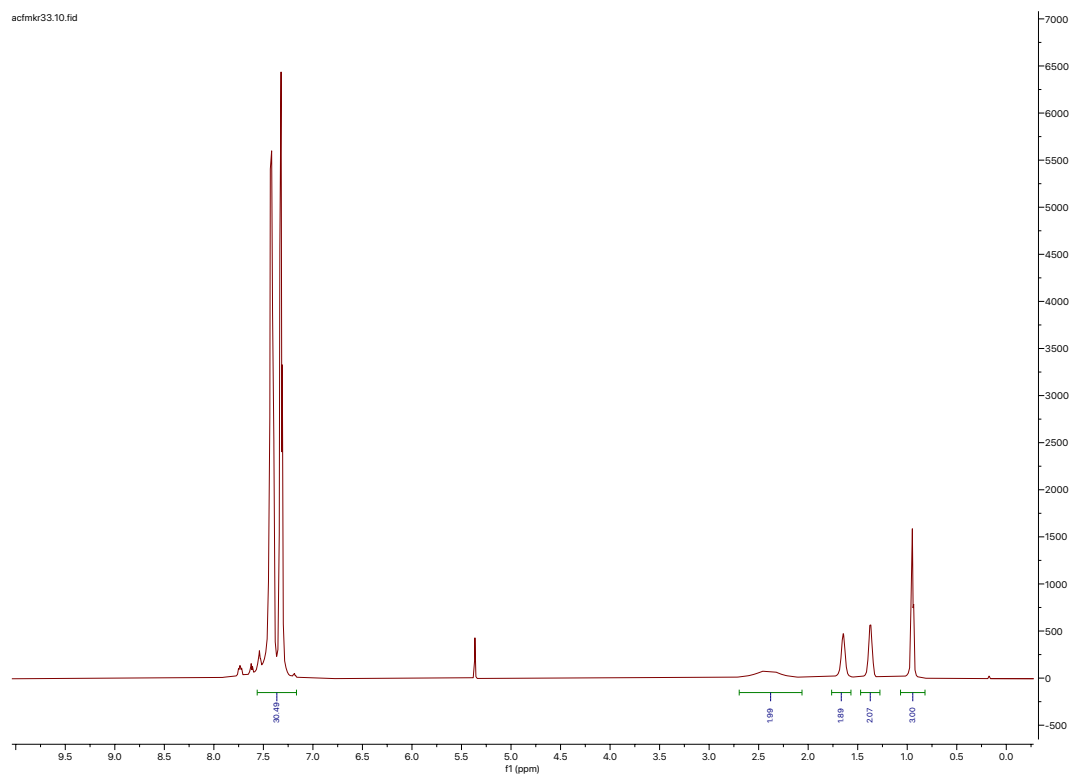

$^{31}\text{P}$ -NMR spectrum of (**7a**) in  $\text{CD}_2\text{Cl}_2$

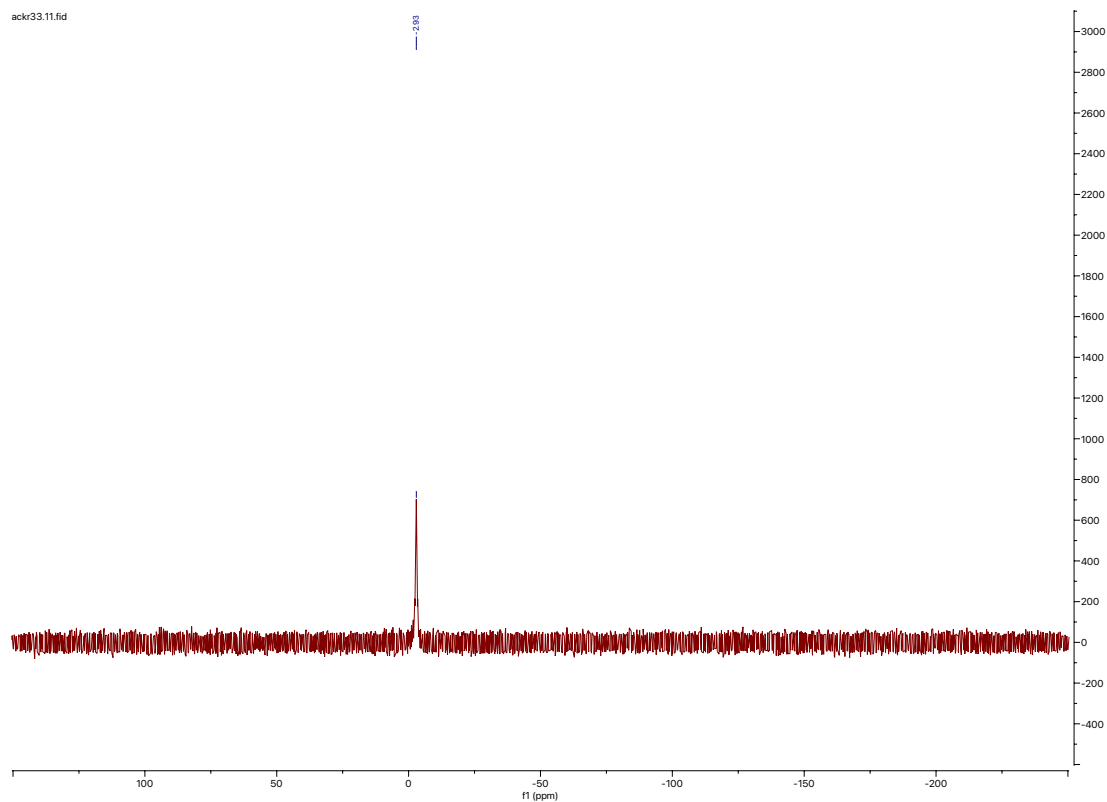

$^{13}\text{C}$ -NMR spectrum of (**7a**) in  $\text{CD}_2\text{Cl}_2$

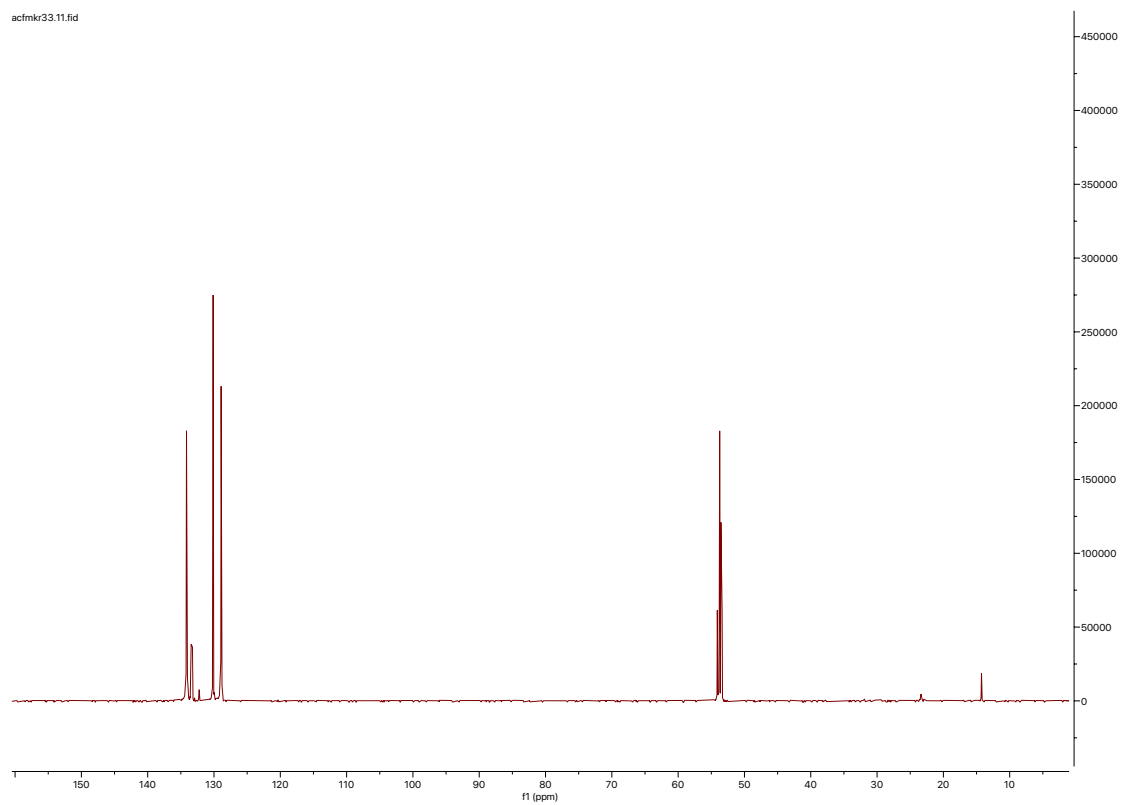

$^1\text{H}$ -NMR spectrum of (**8a**) in  $\text{CD}_2\text{Cl}_2$

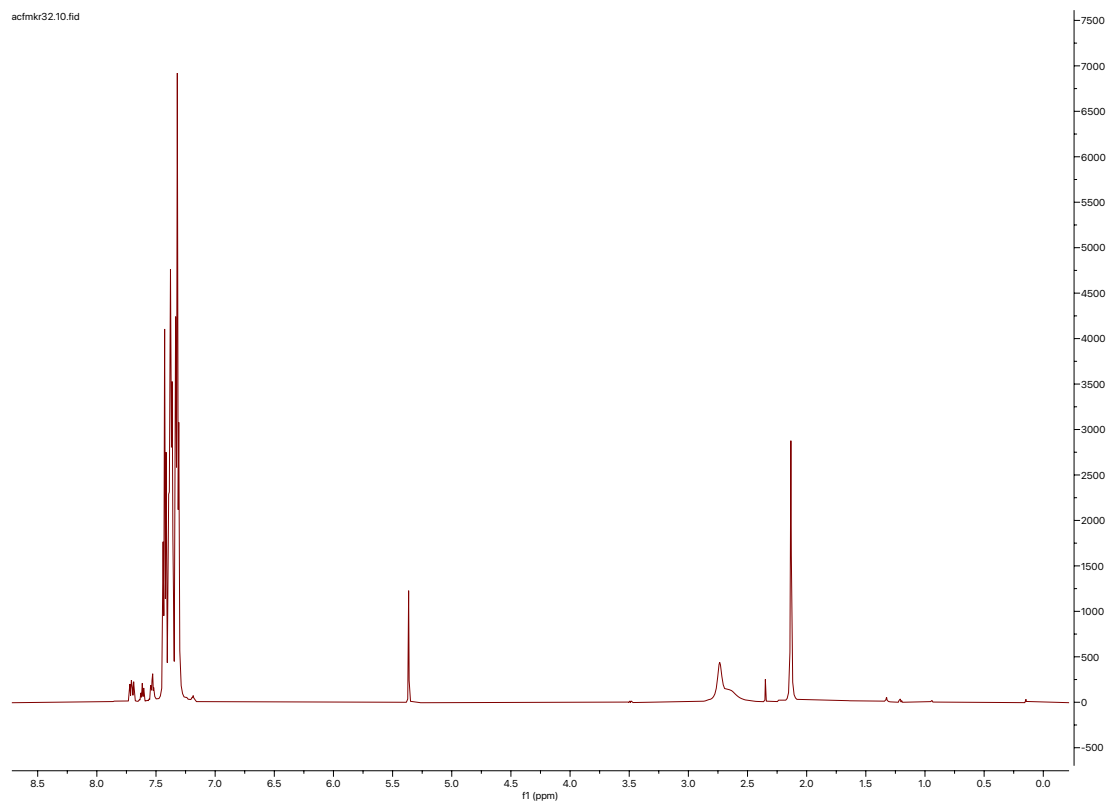

$^{31}\text{P}$ -NMR spectrum of (**8a**) in  $\text{CD}_2\text{Cl}_2$

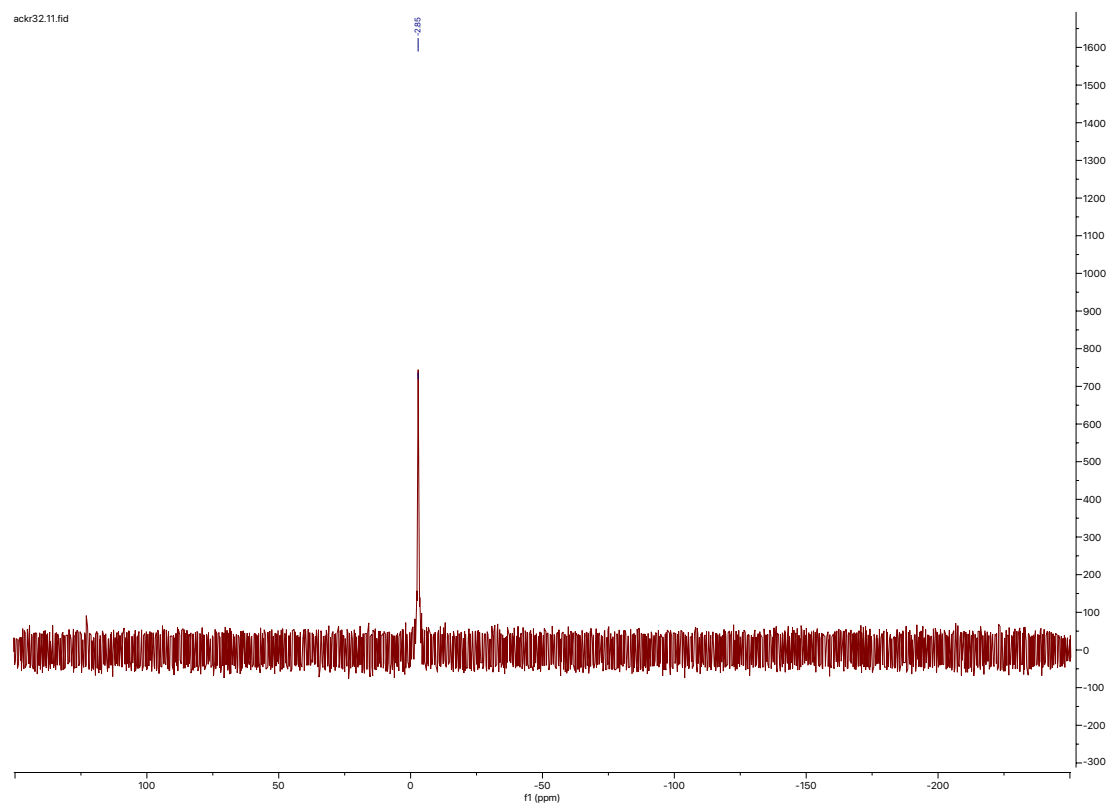

$^{13}\text{C}$ -NMR spectrum of (**8a**) in  $\text{CD}_2\text{Cl}_2$

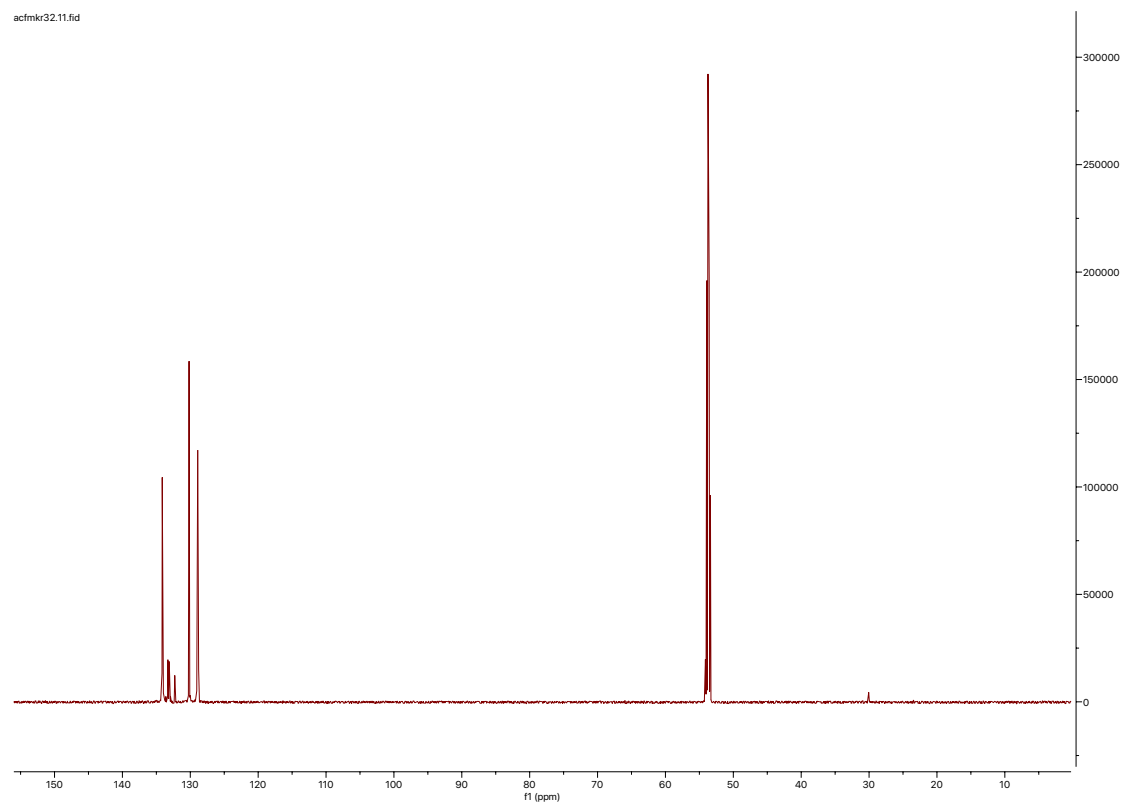

Supplement: s1 [file s1]
